# Supplementary material for: Genomics-Enabled Novel Insight Into the Pathovar-Specific Population Structure of the Bacterial Leaf Streak Pathogen Xanthomonas translucens in Small Grain Cereals
Source: PubMed Central journal article supplement (PMC8195340; doi:10.3389/fmicb.2021.674952), 2021-05-28

DSM 18974

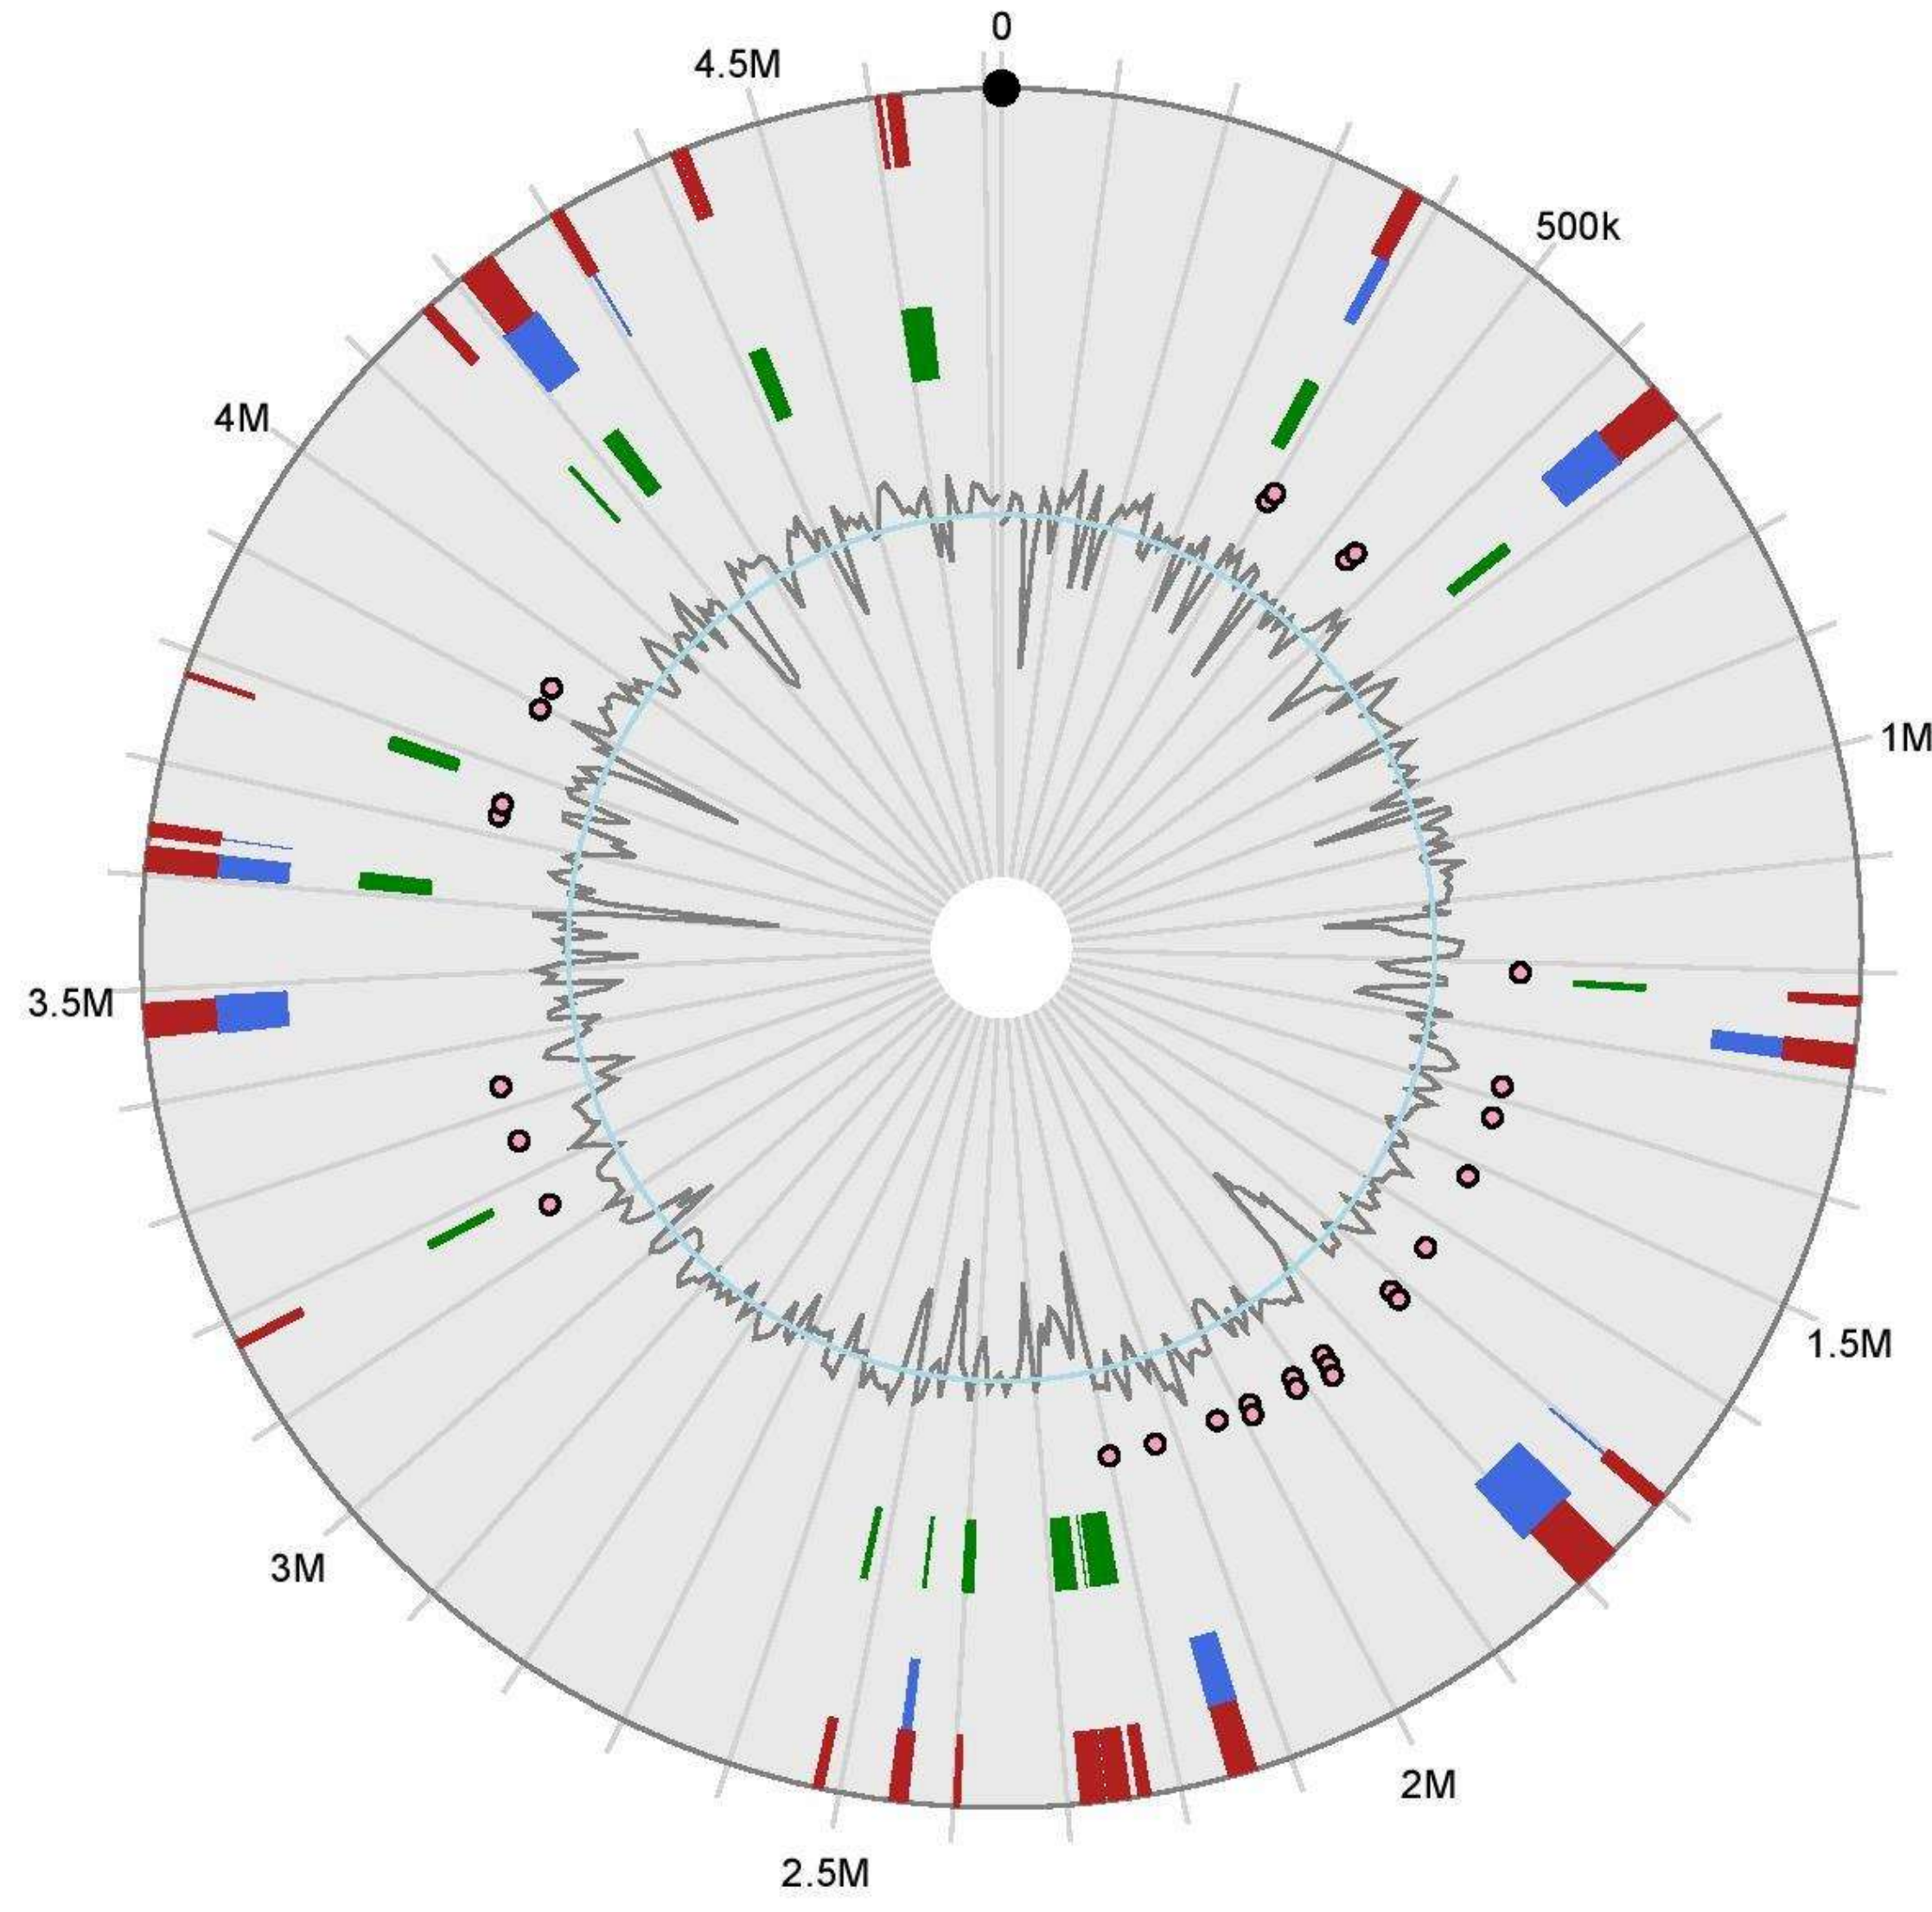

ICMP 11055

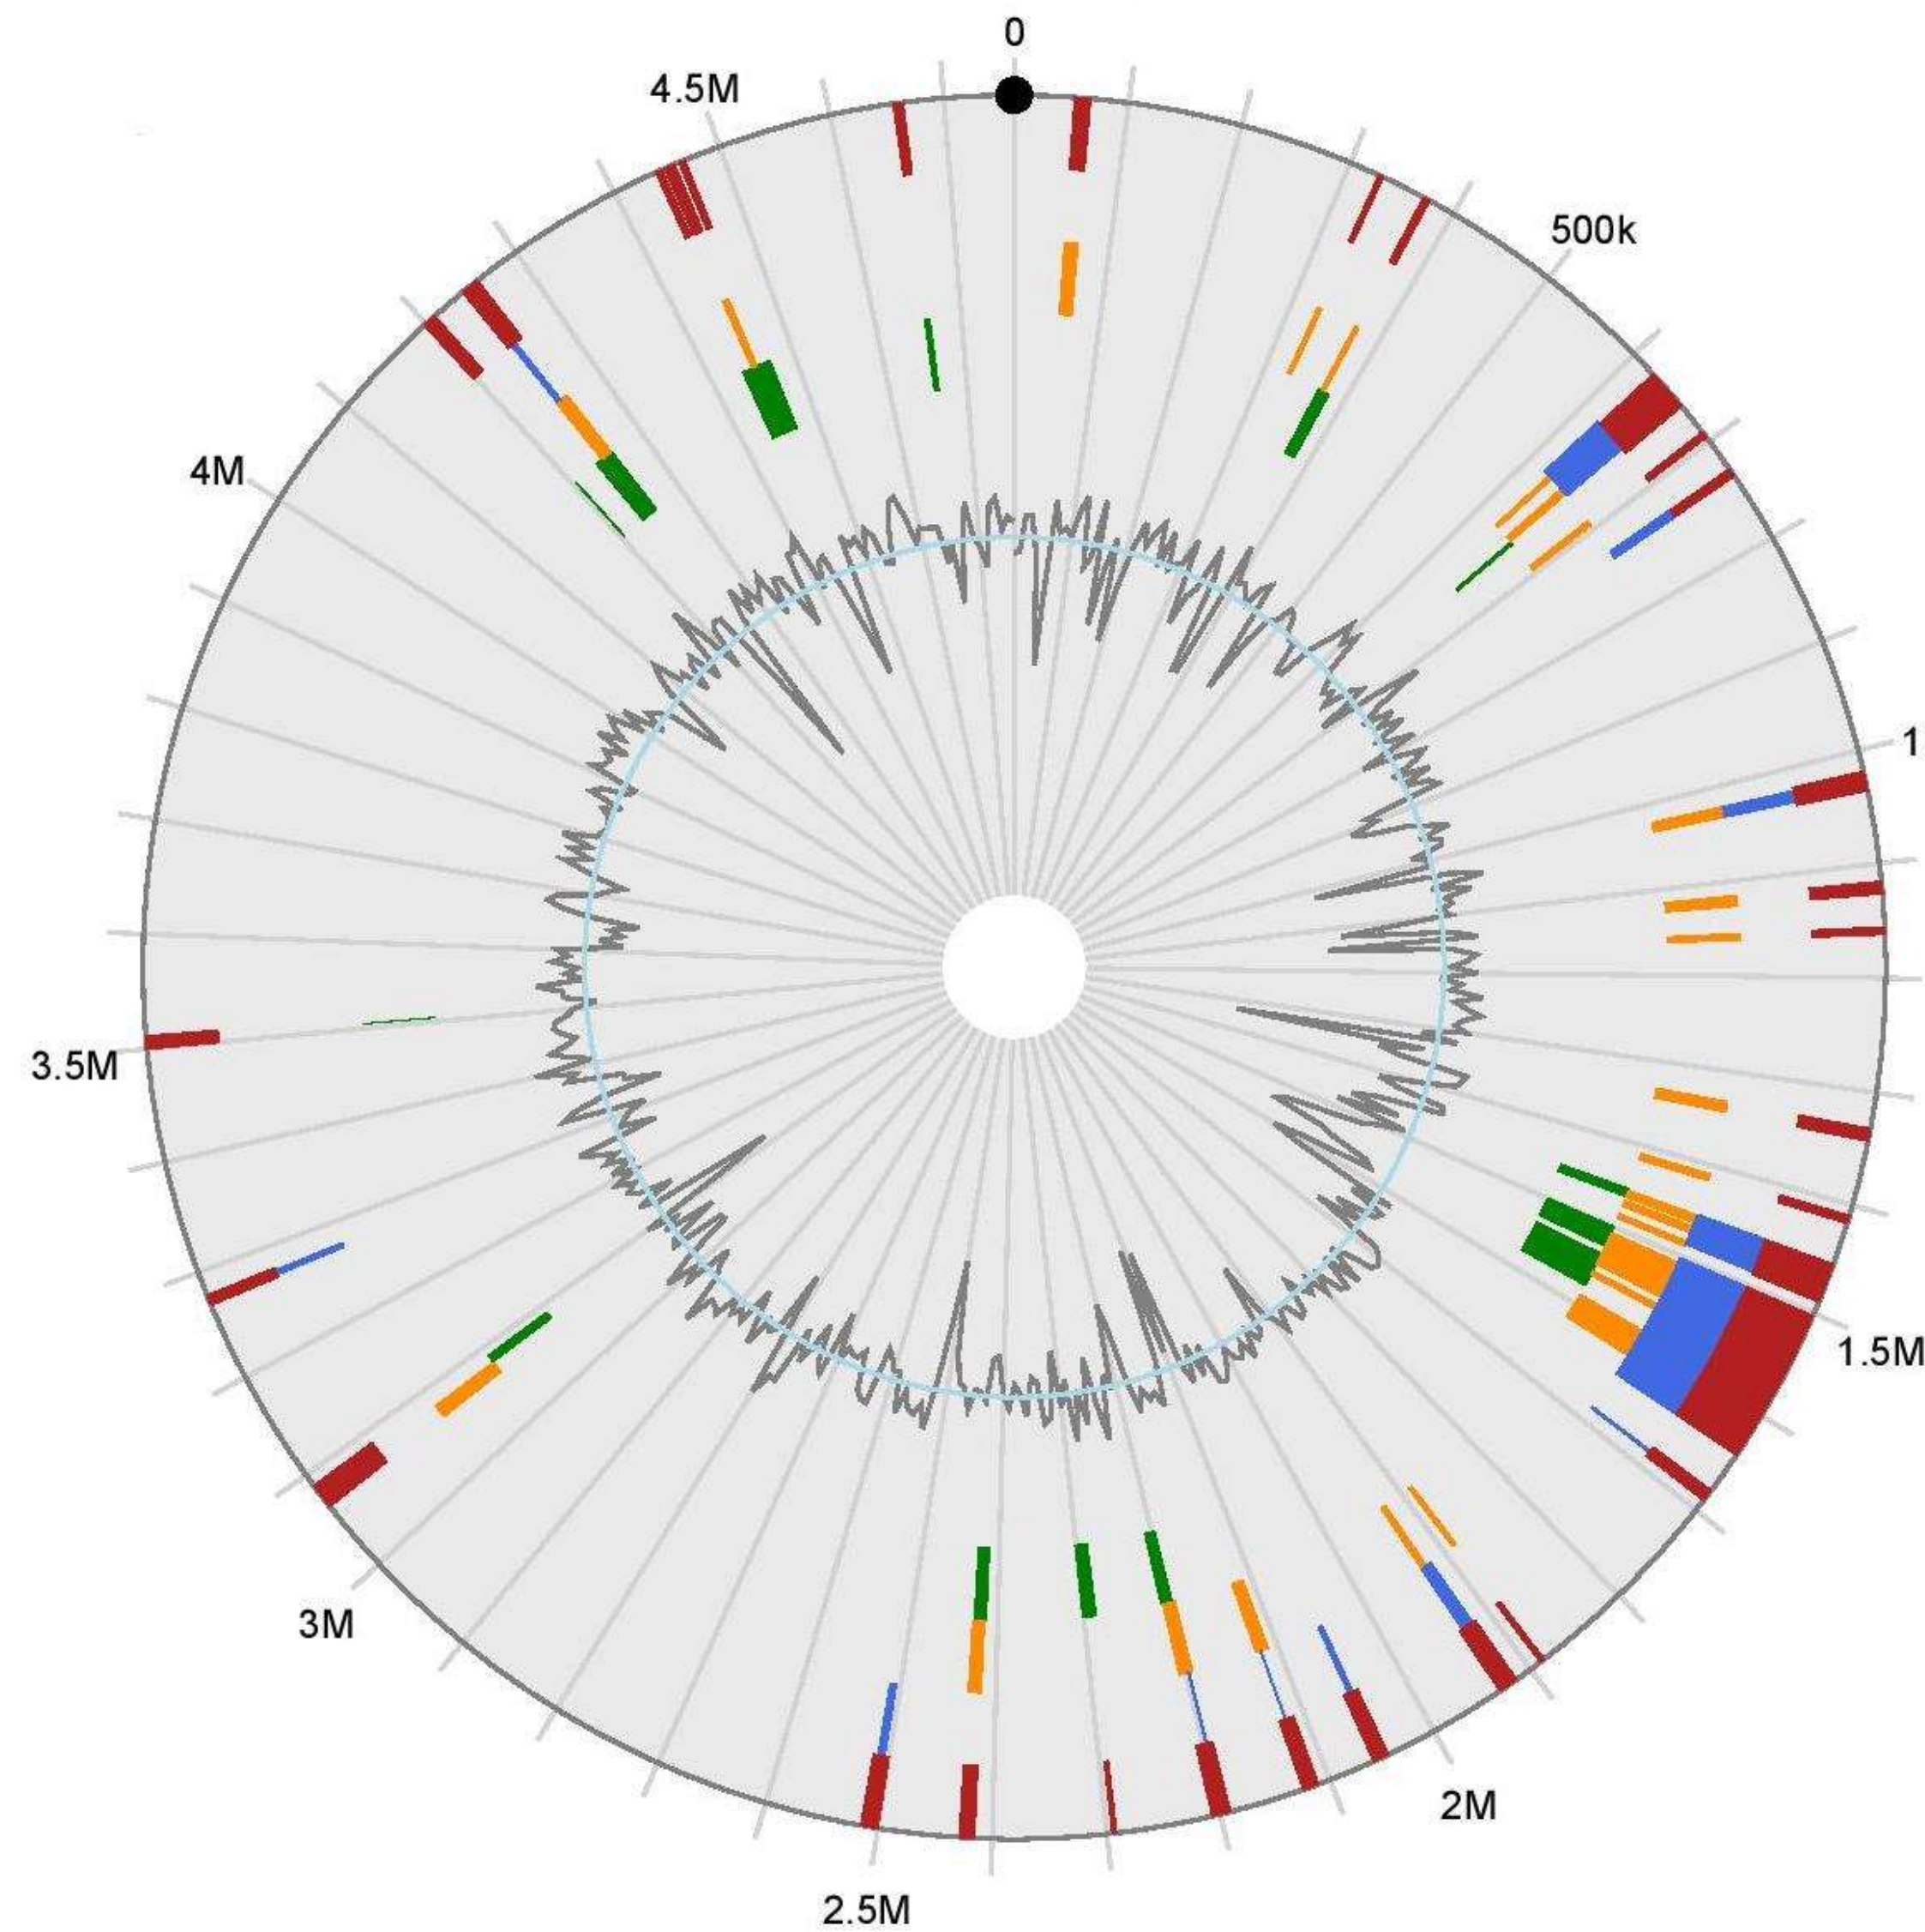

LW16

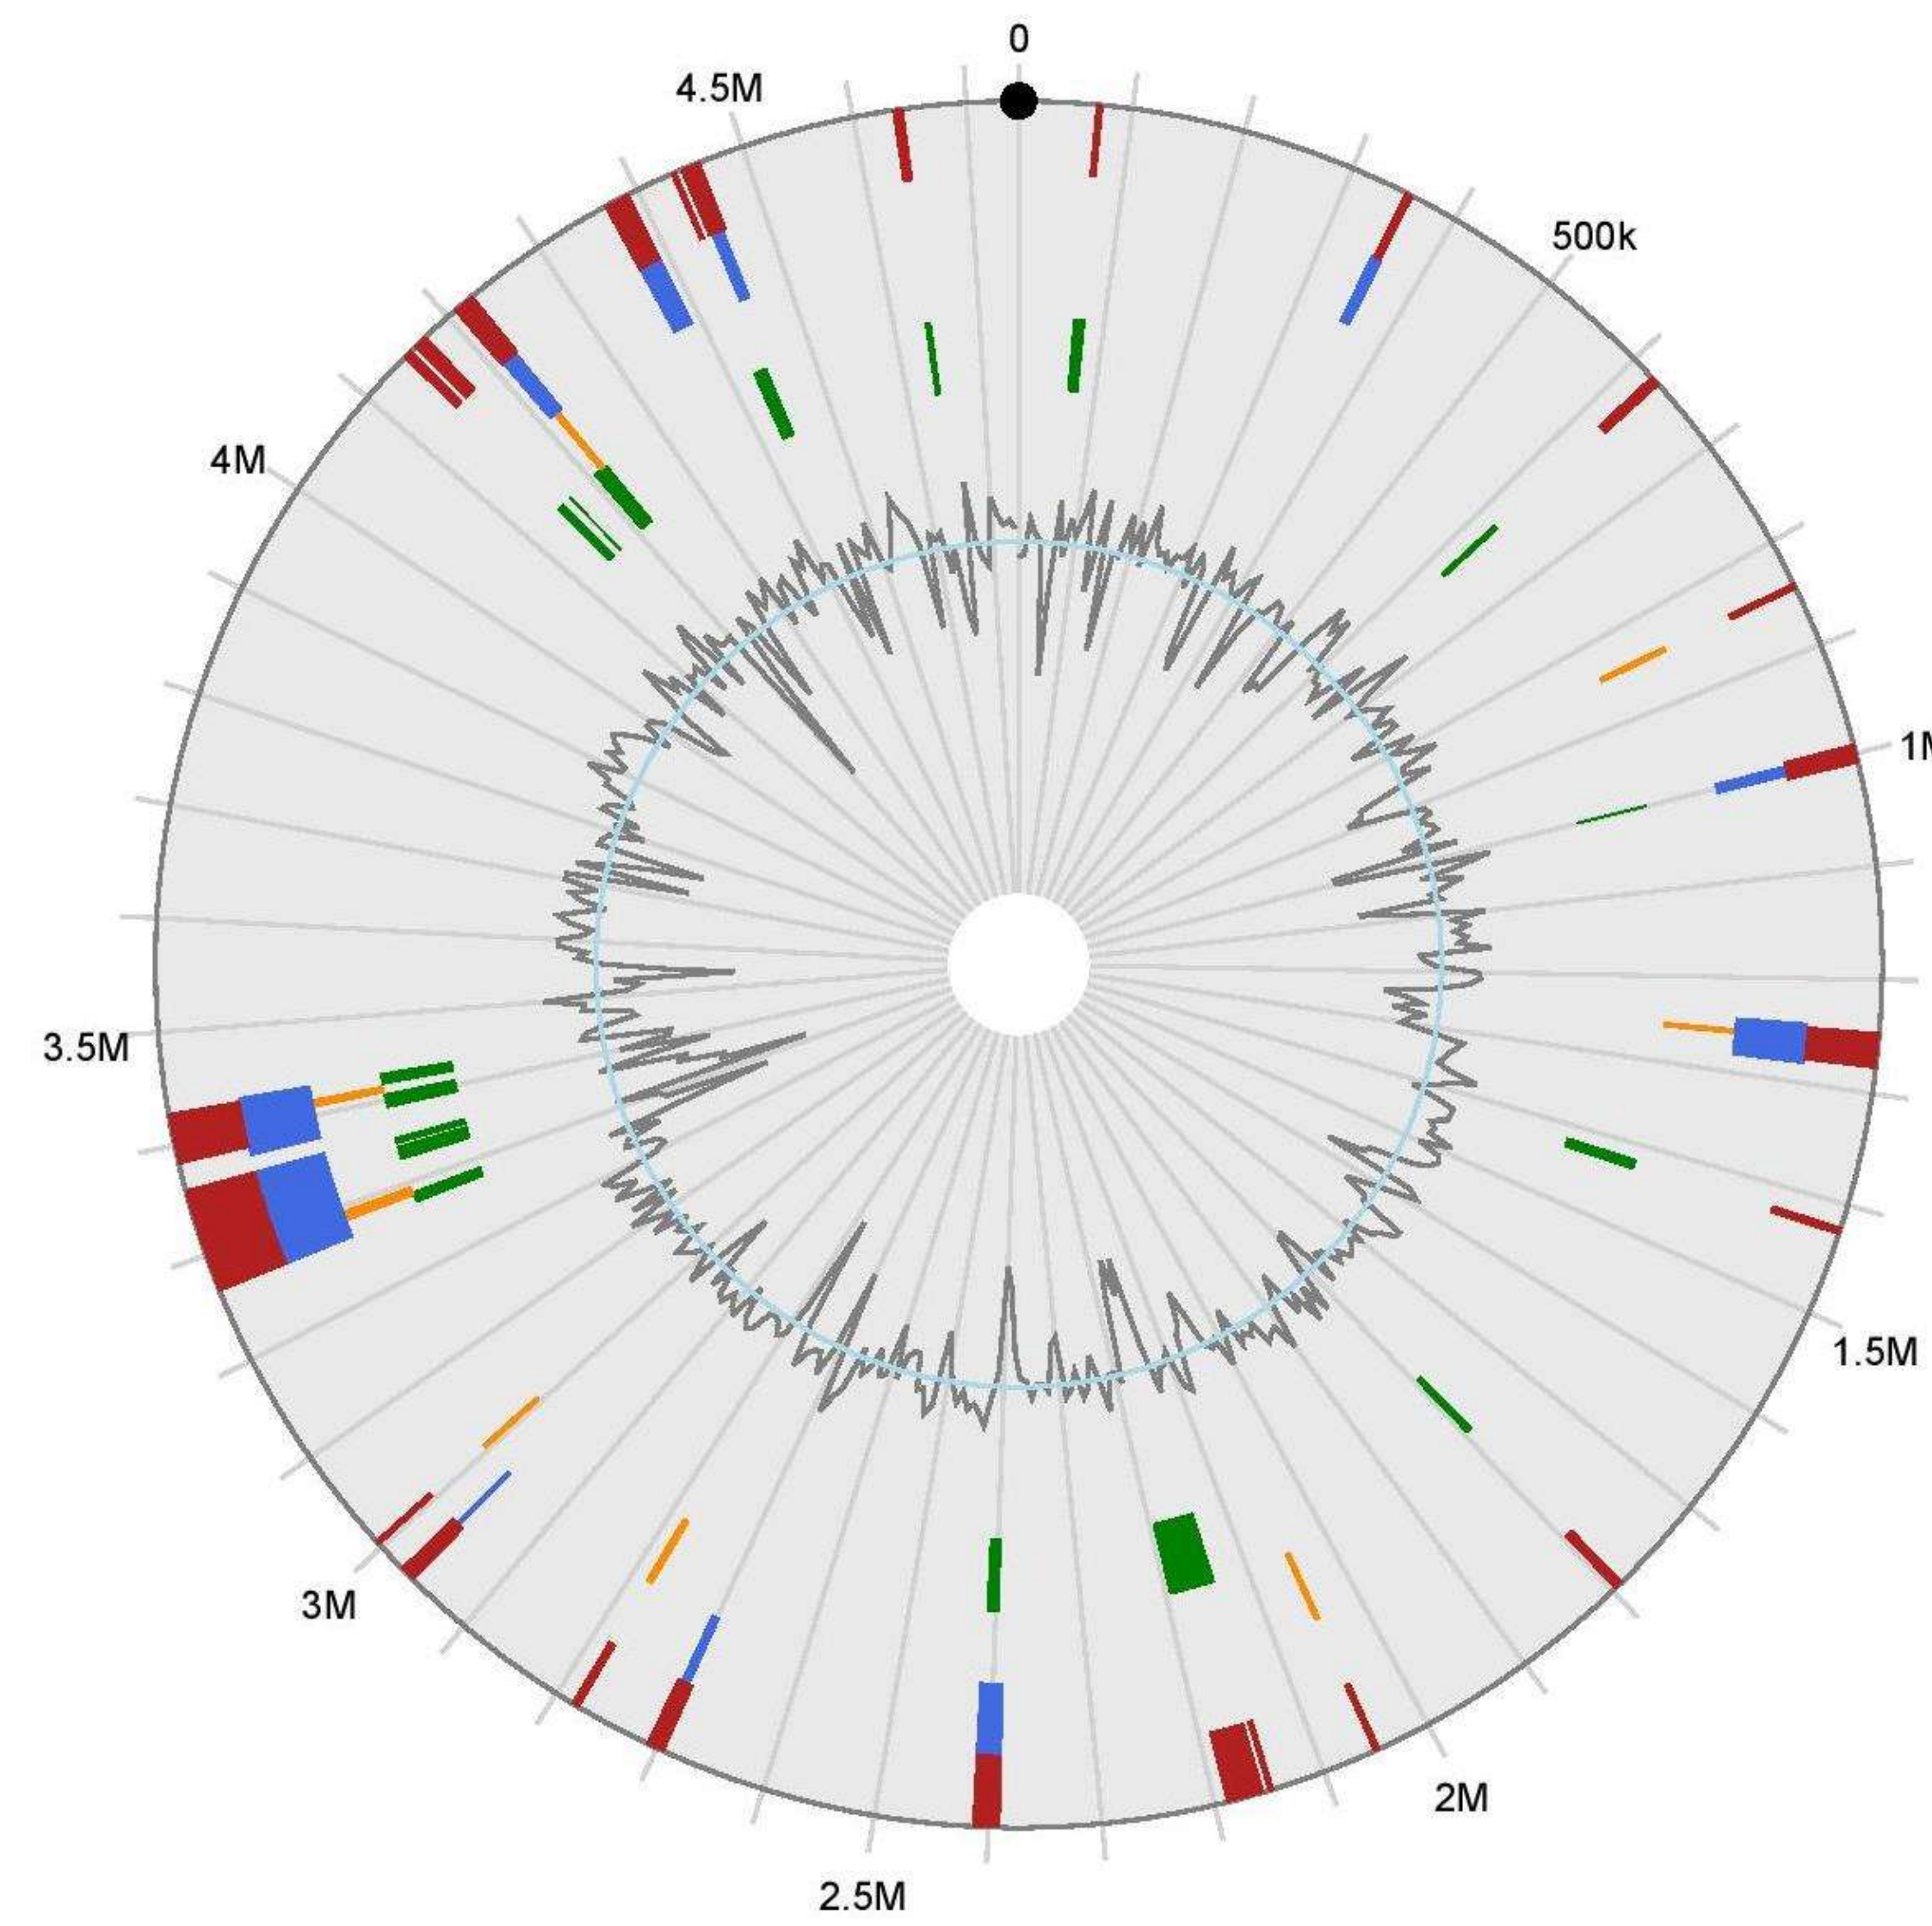

P3

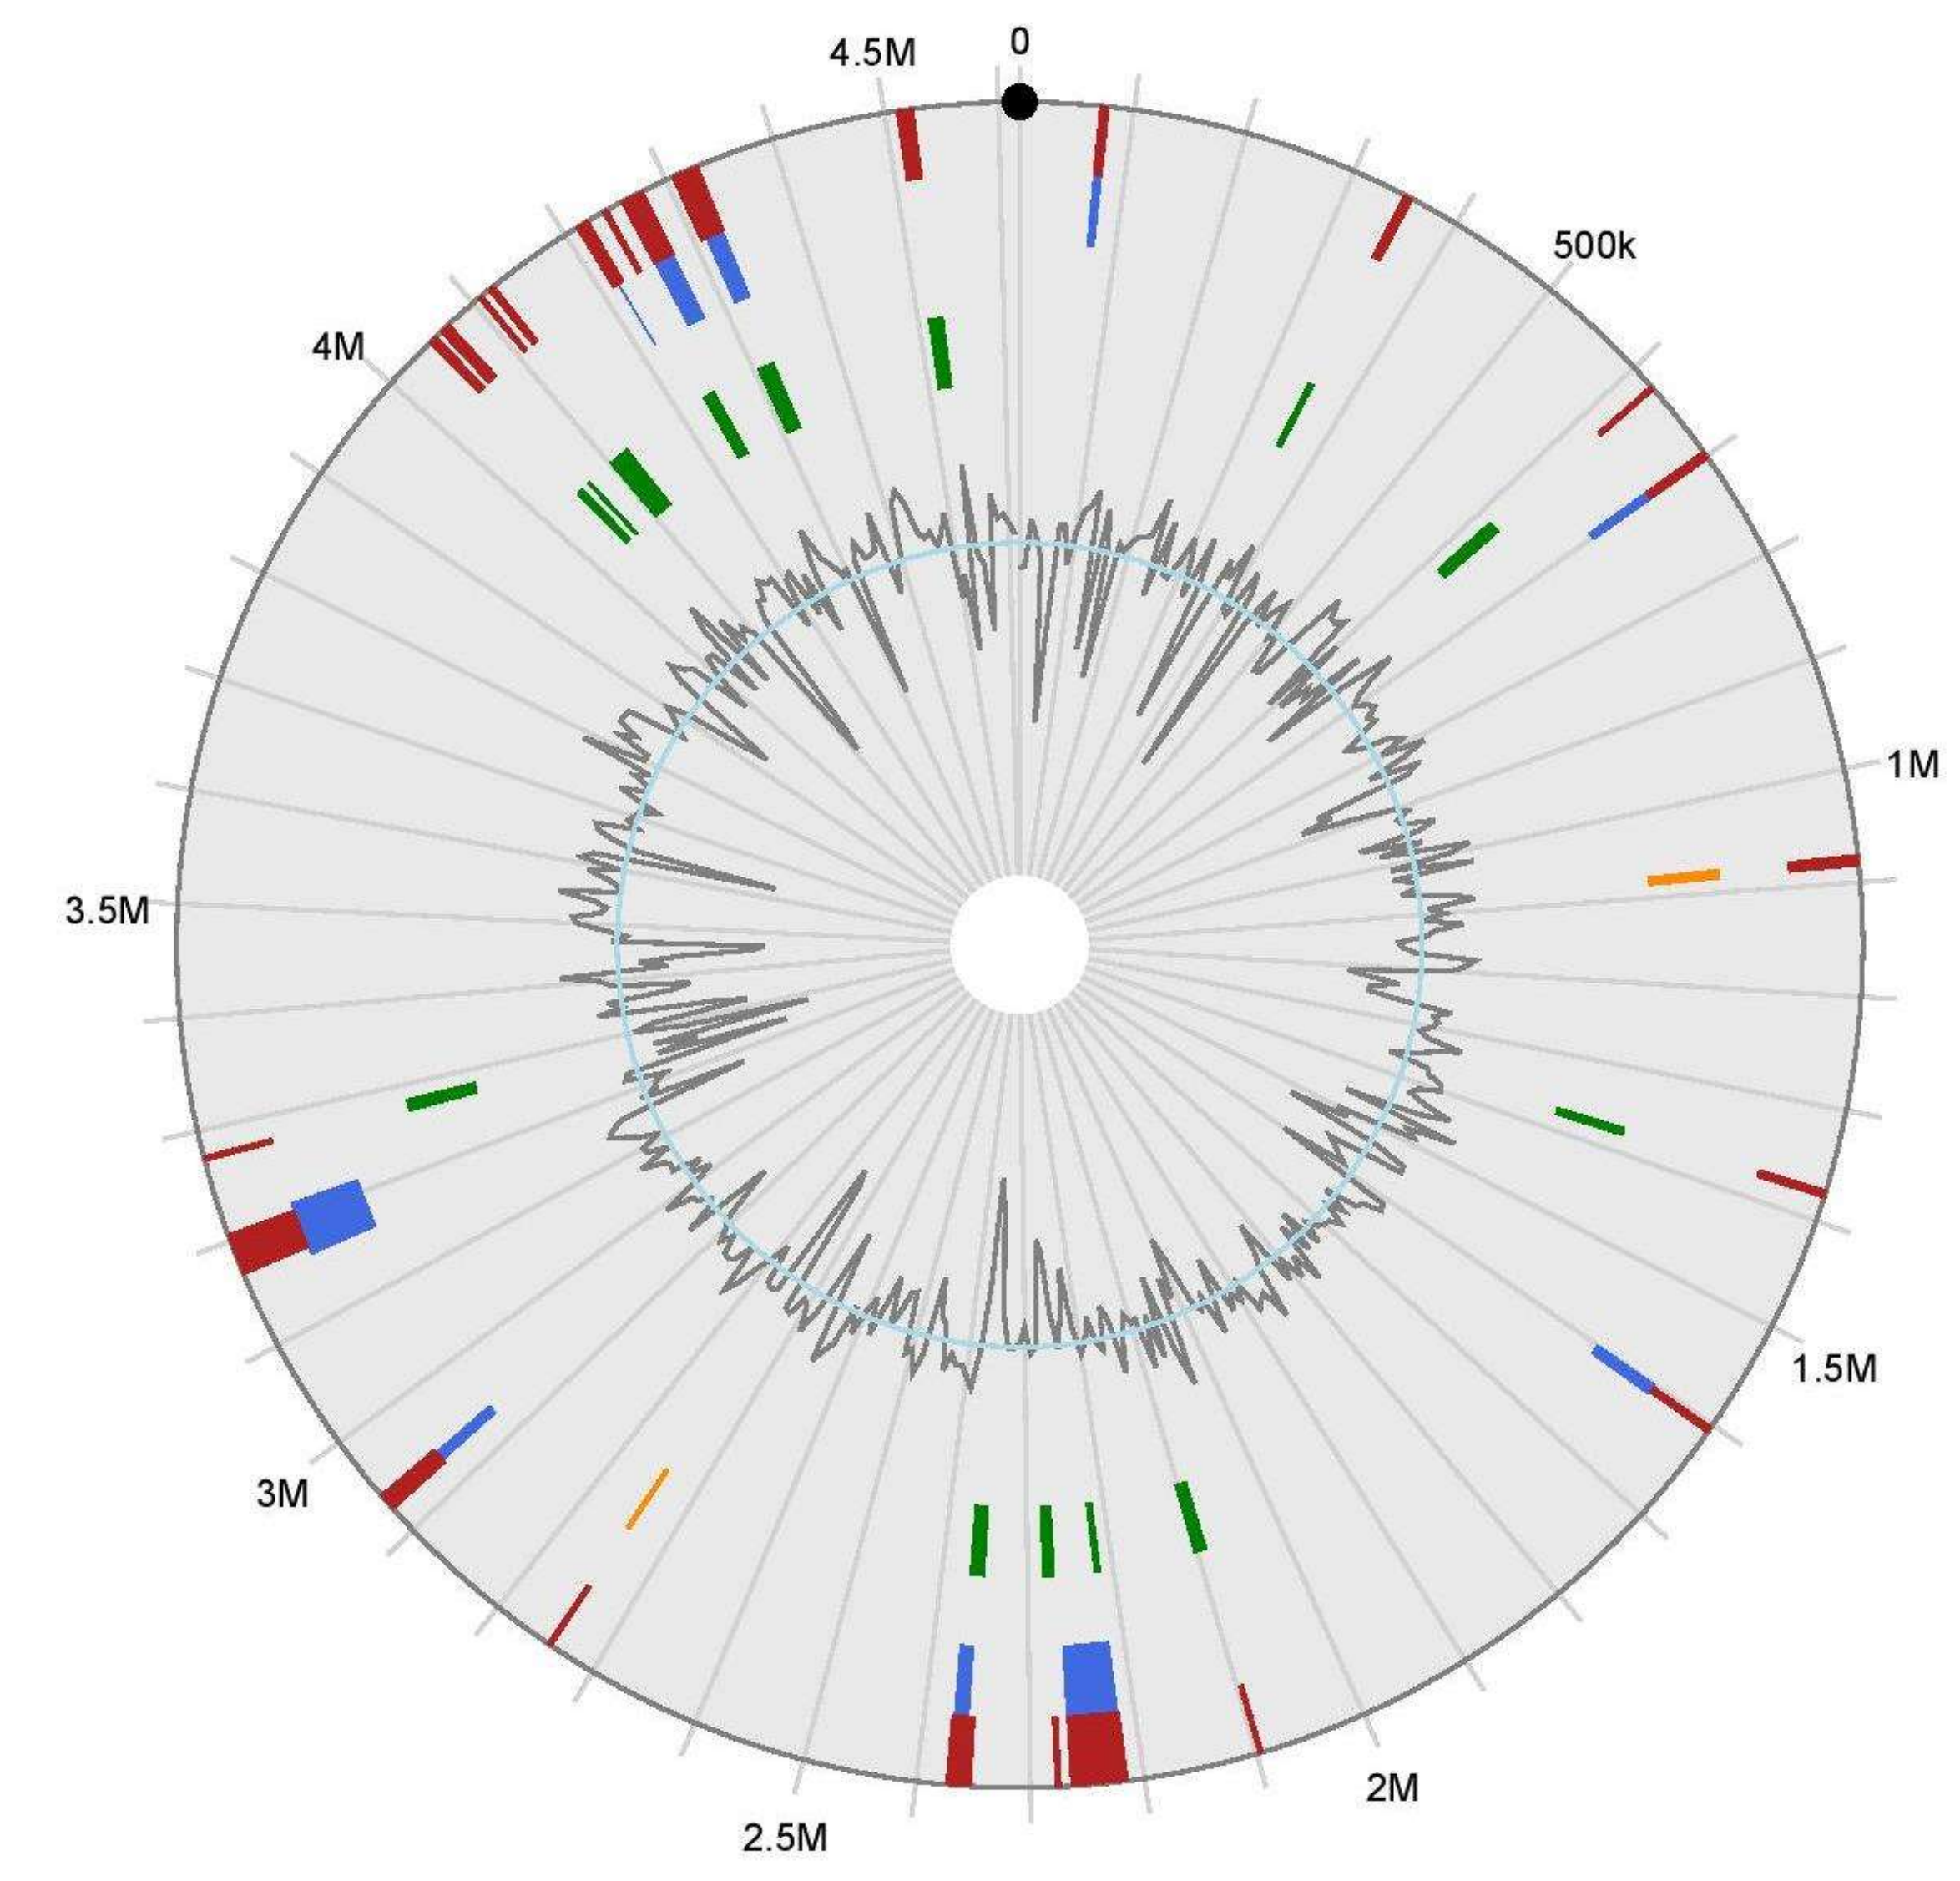

XtFa1

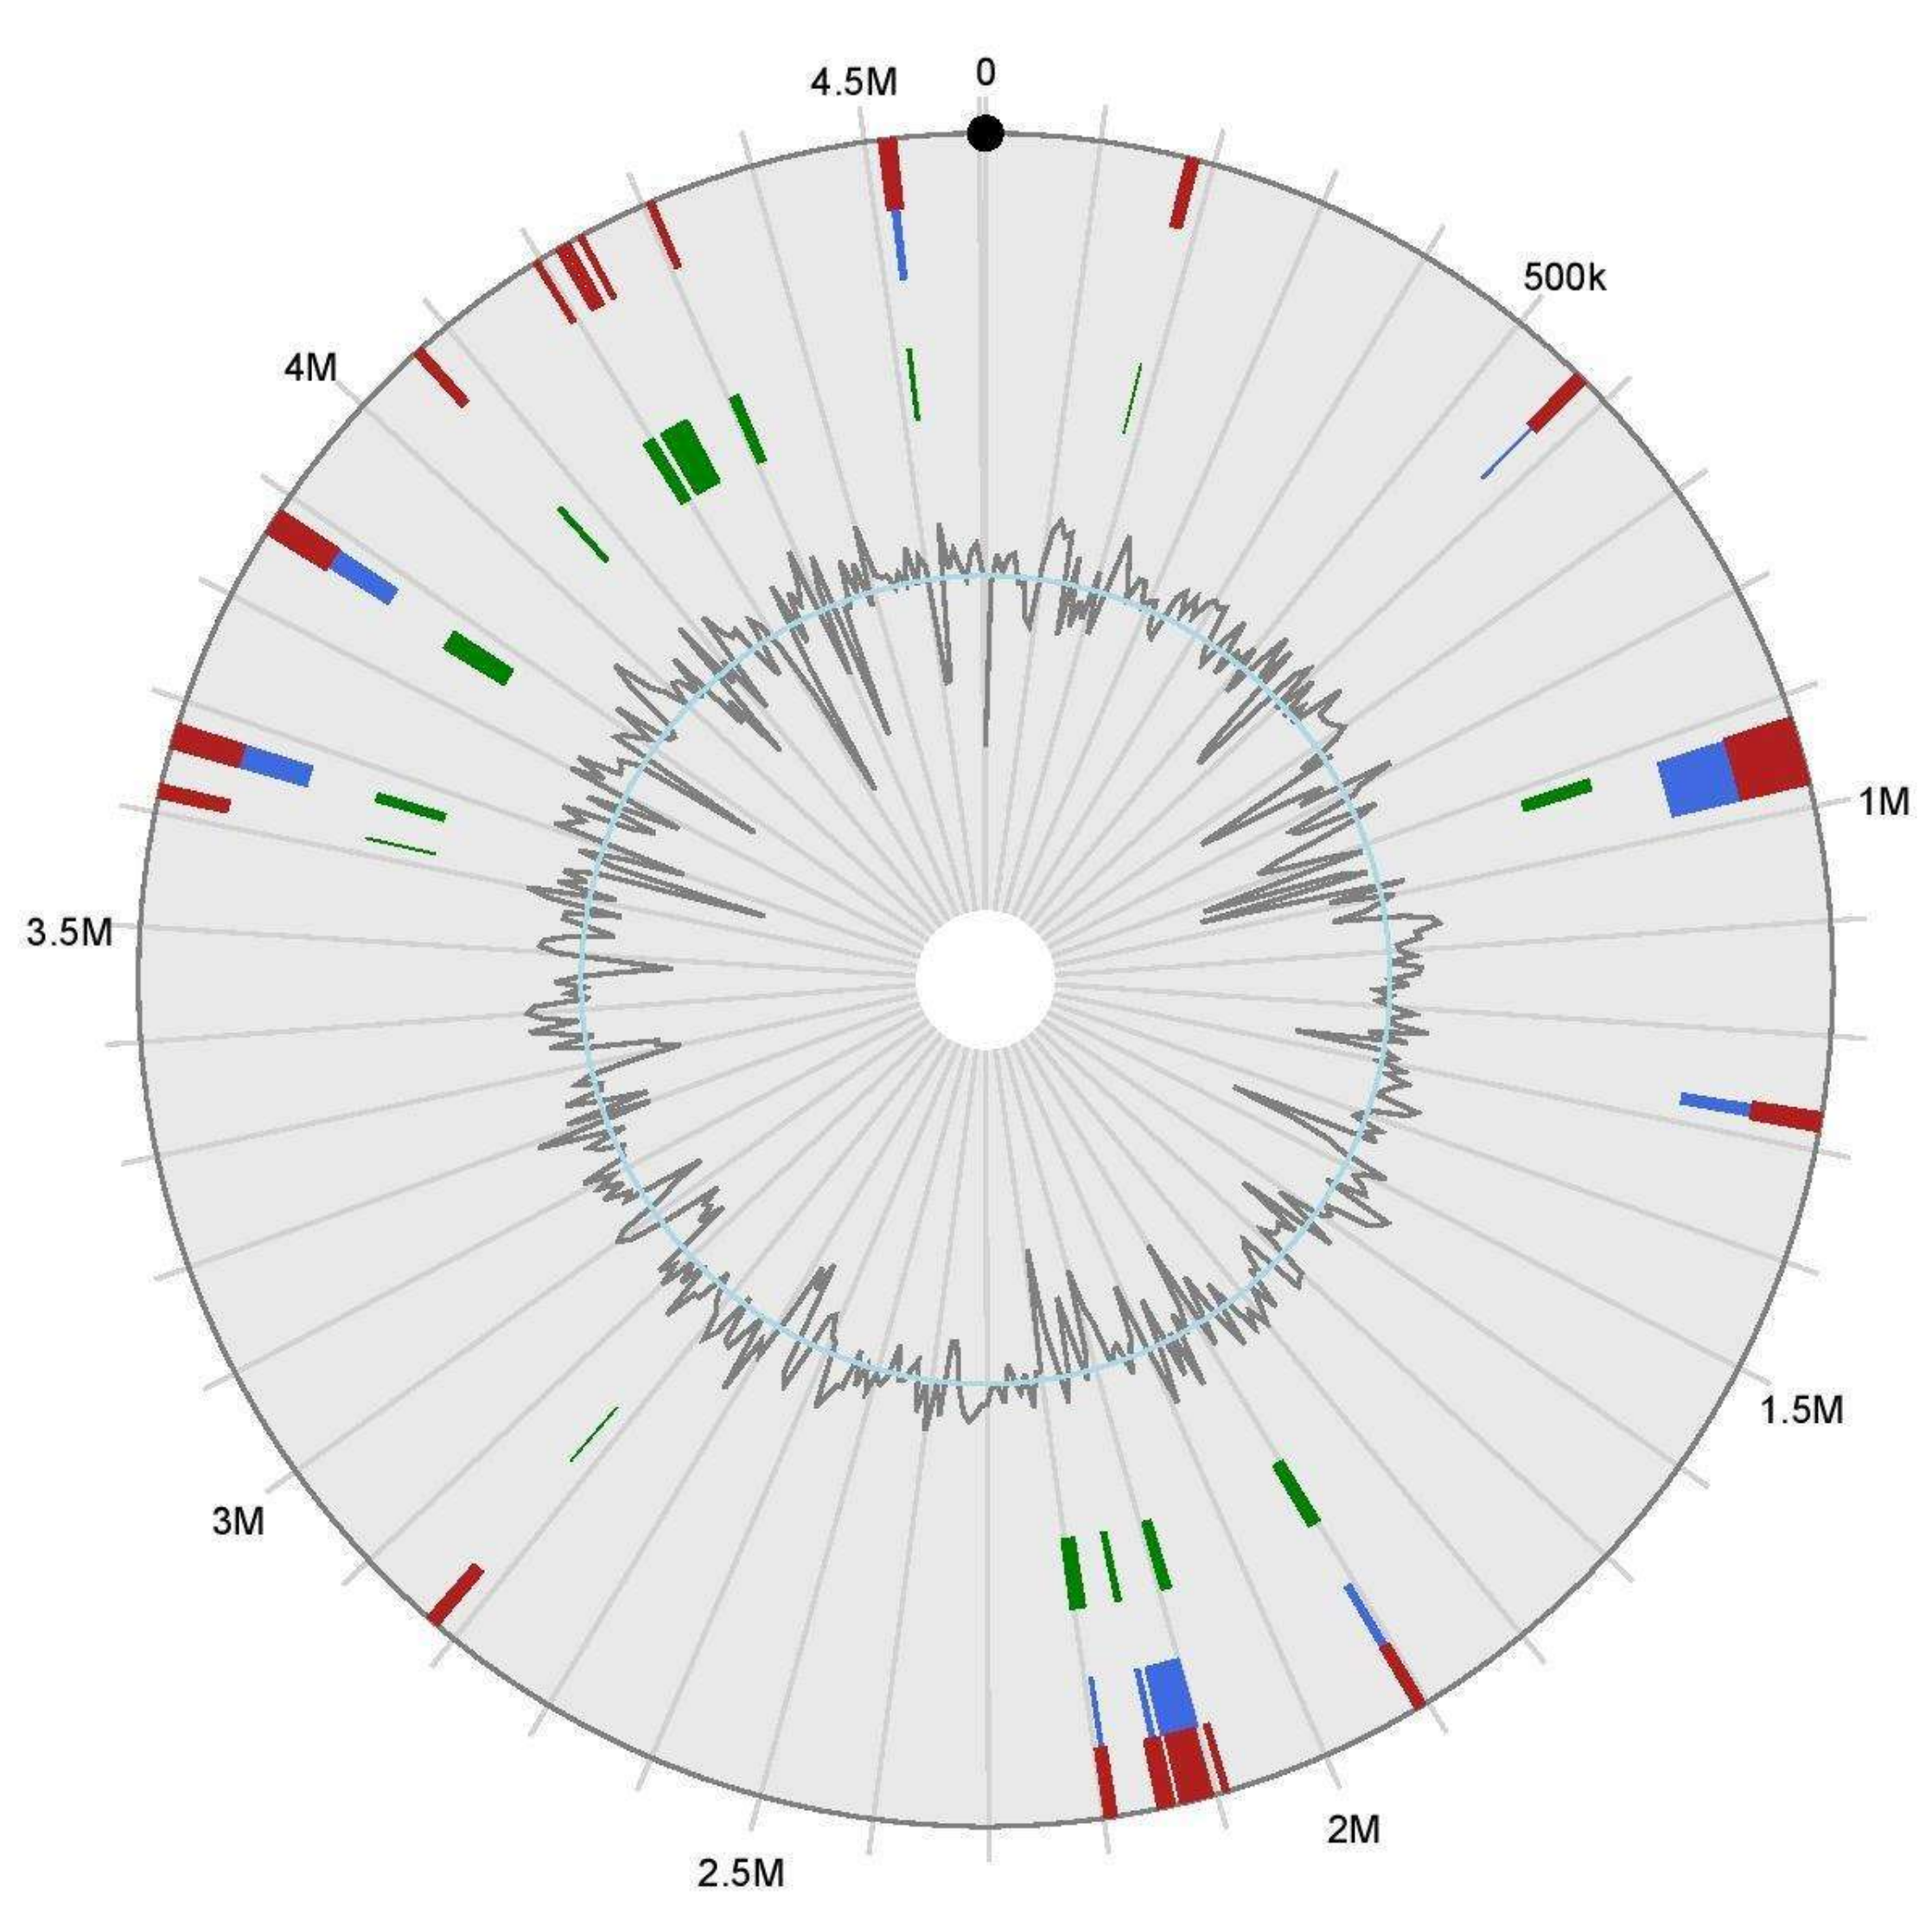

XtKm8

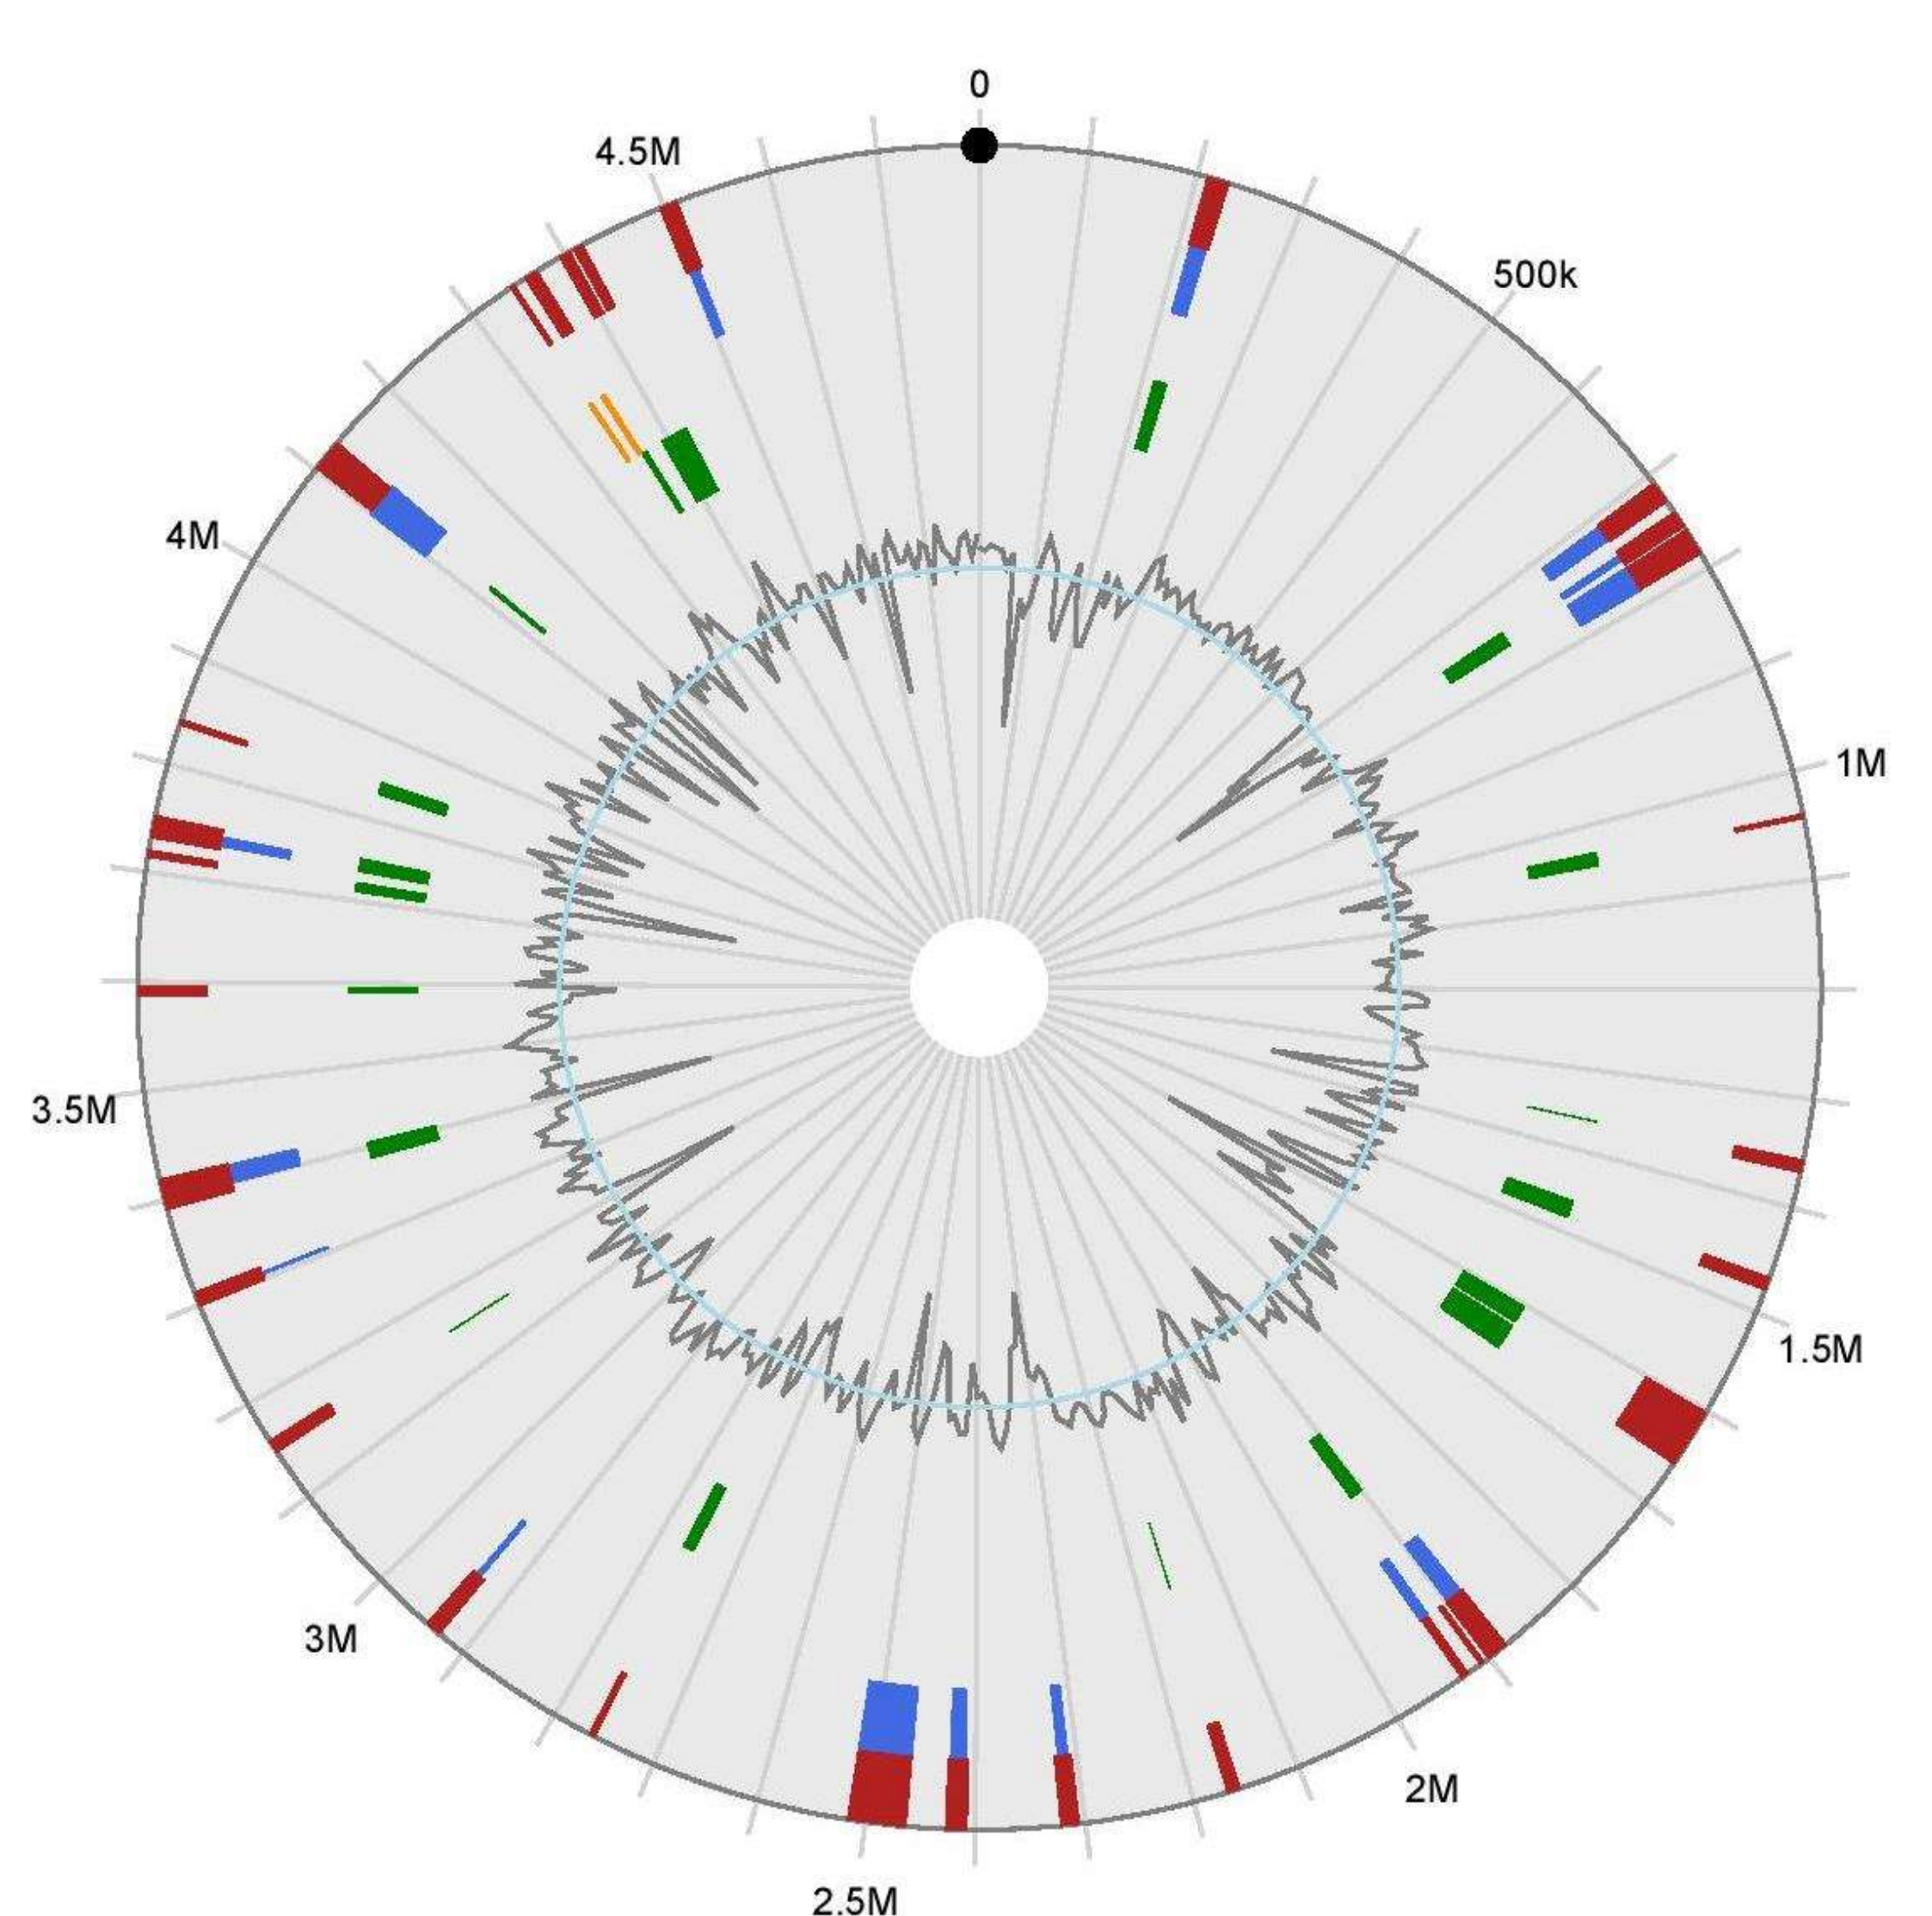

XtKm9

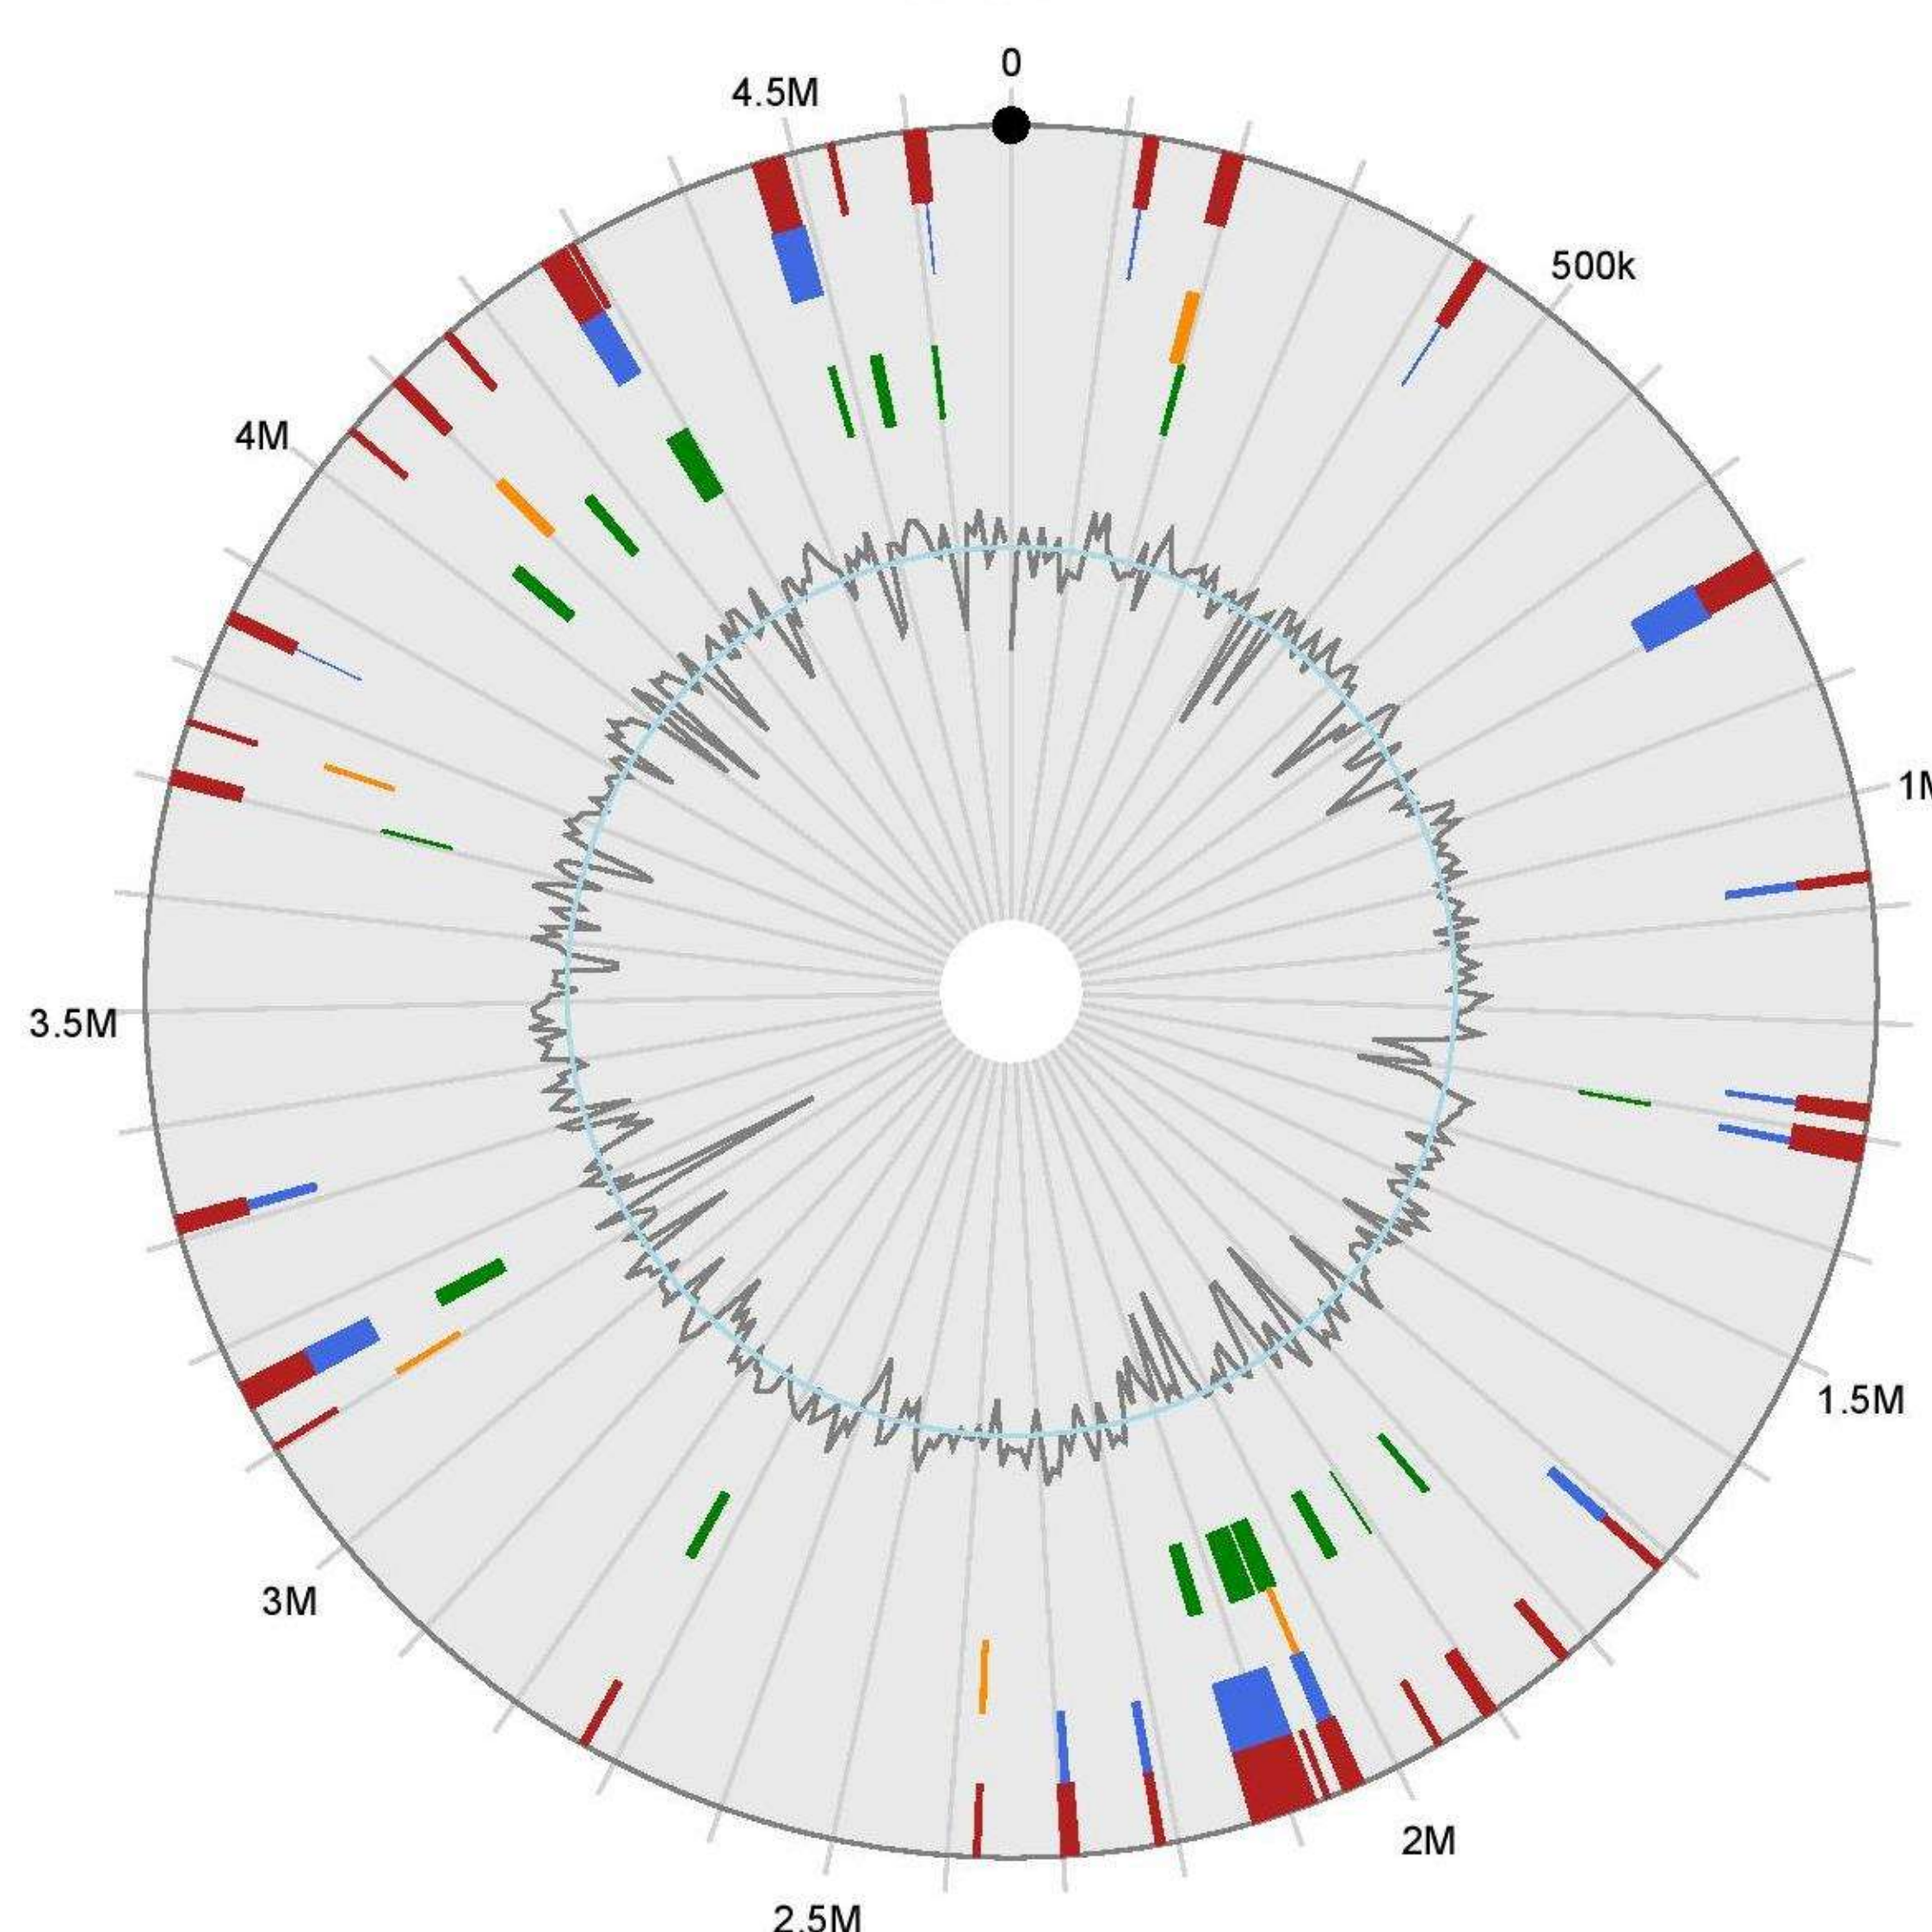

XtKm12

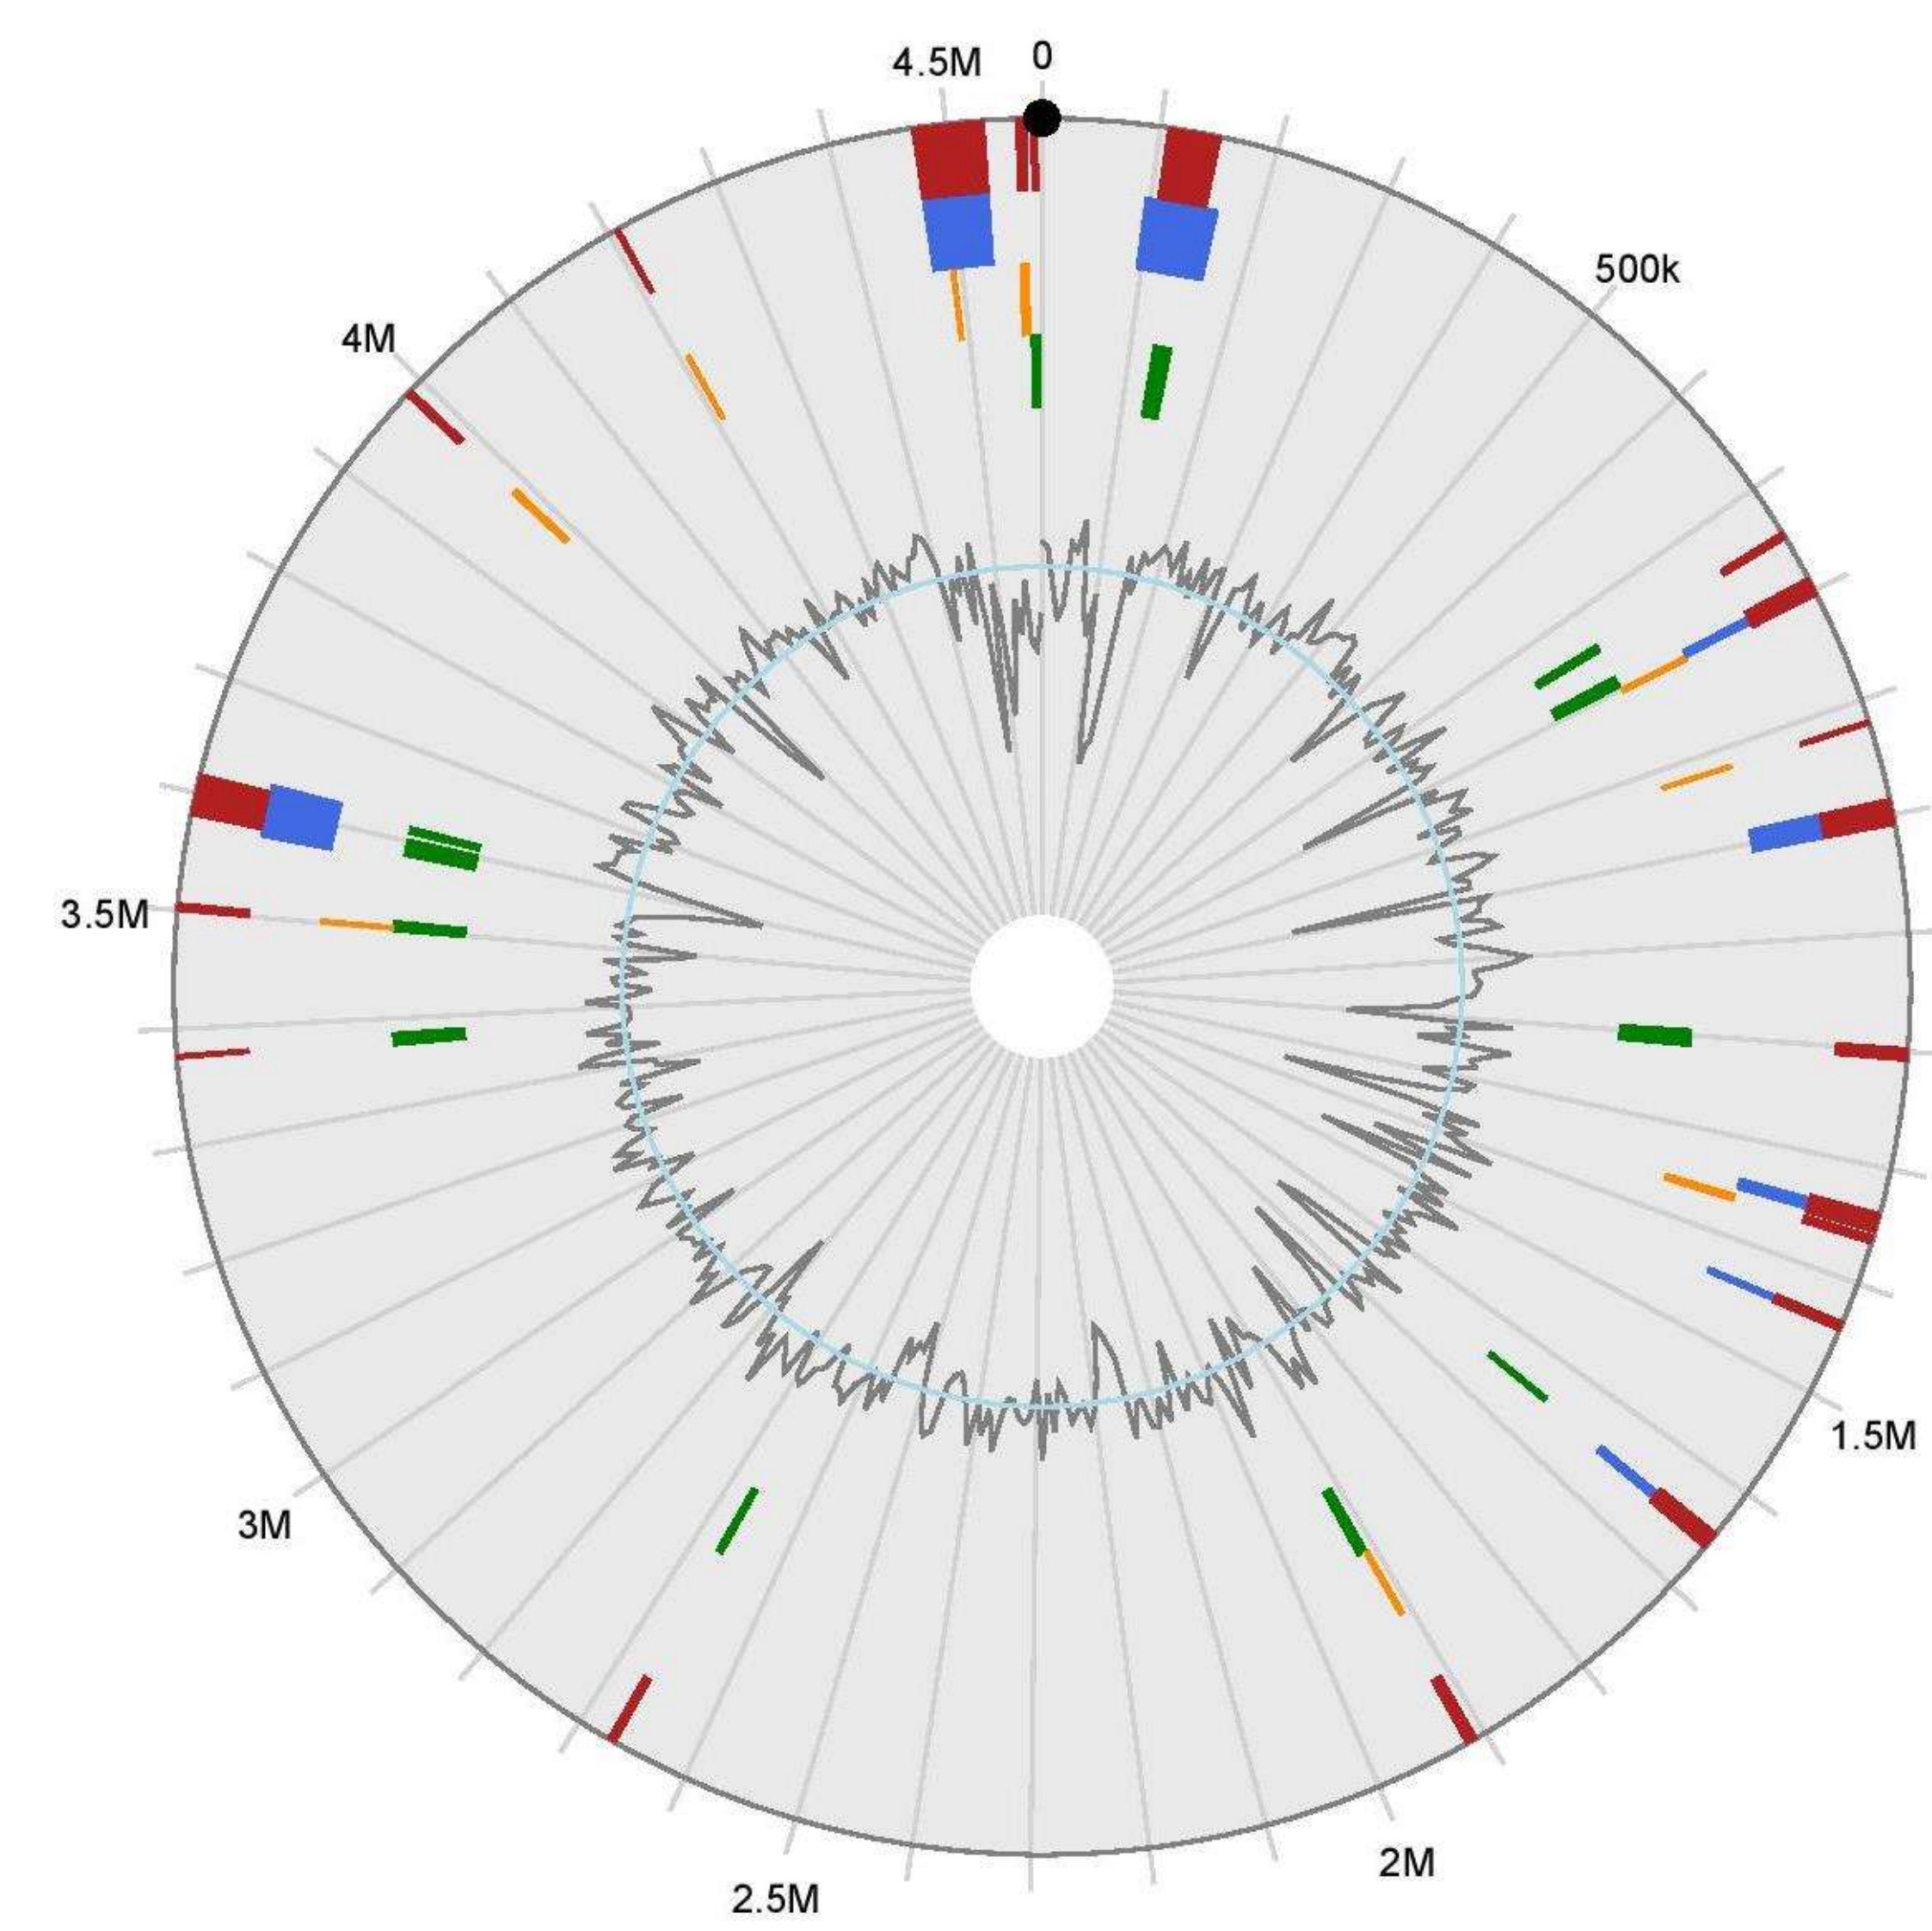

XtKm15

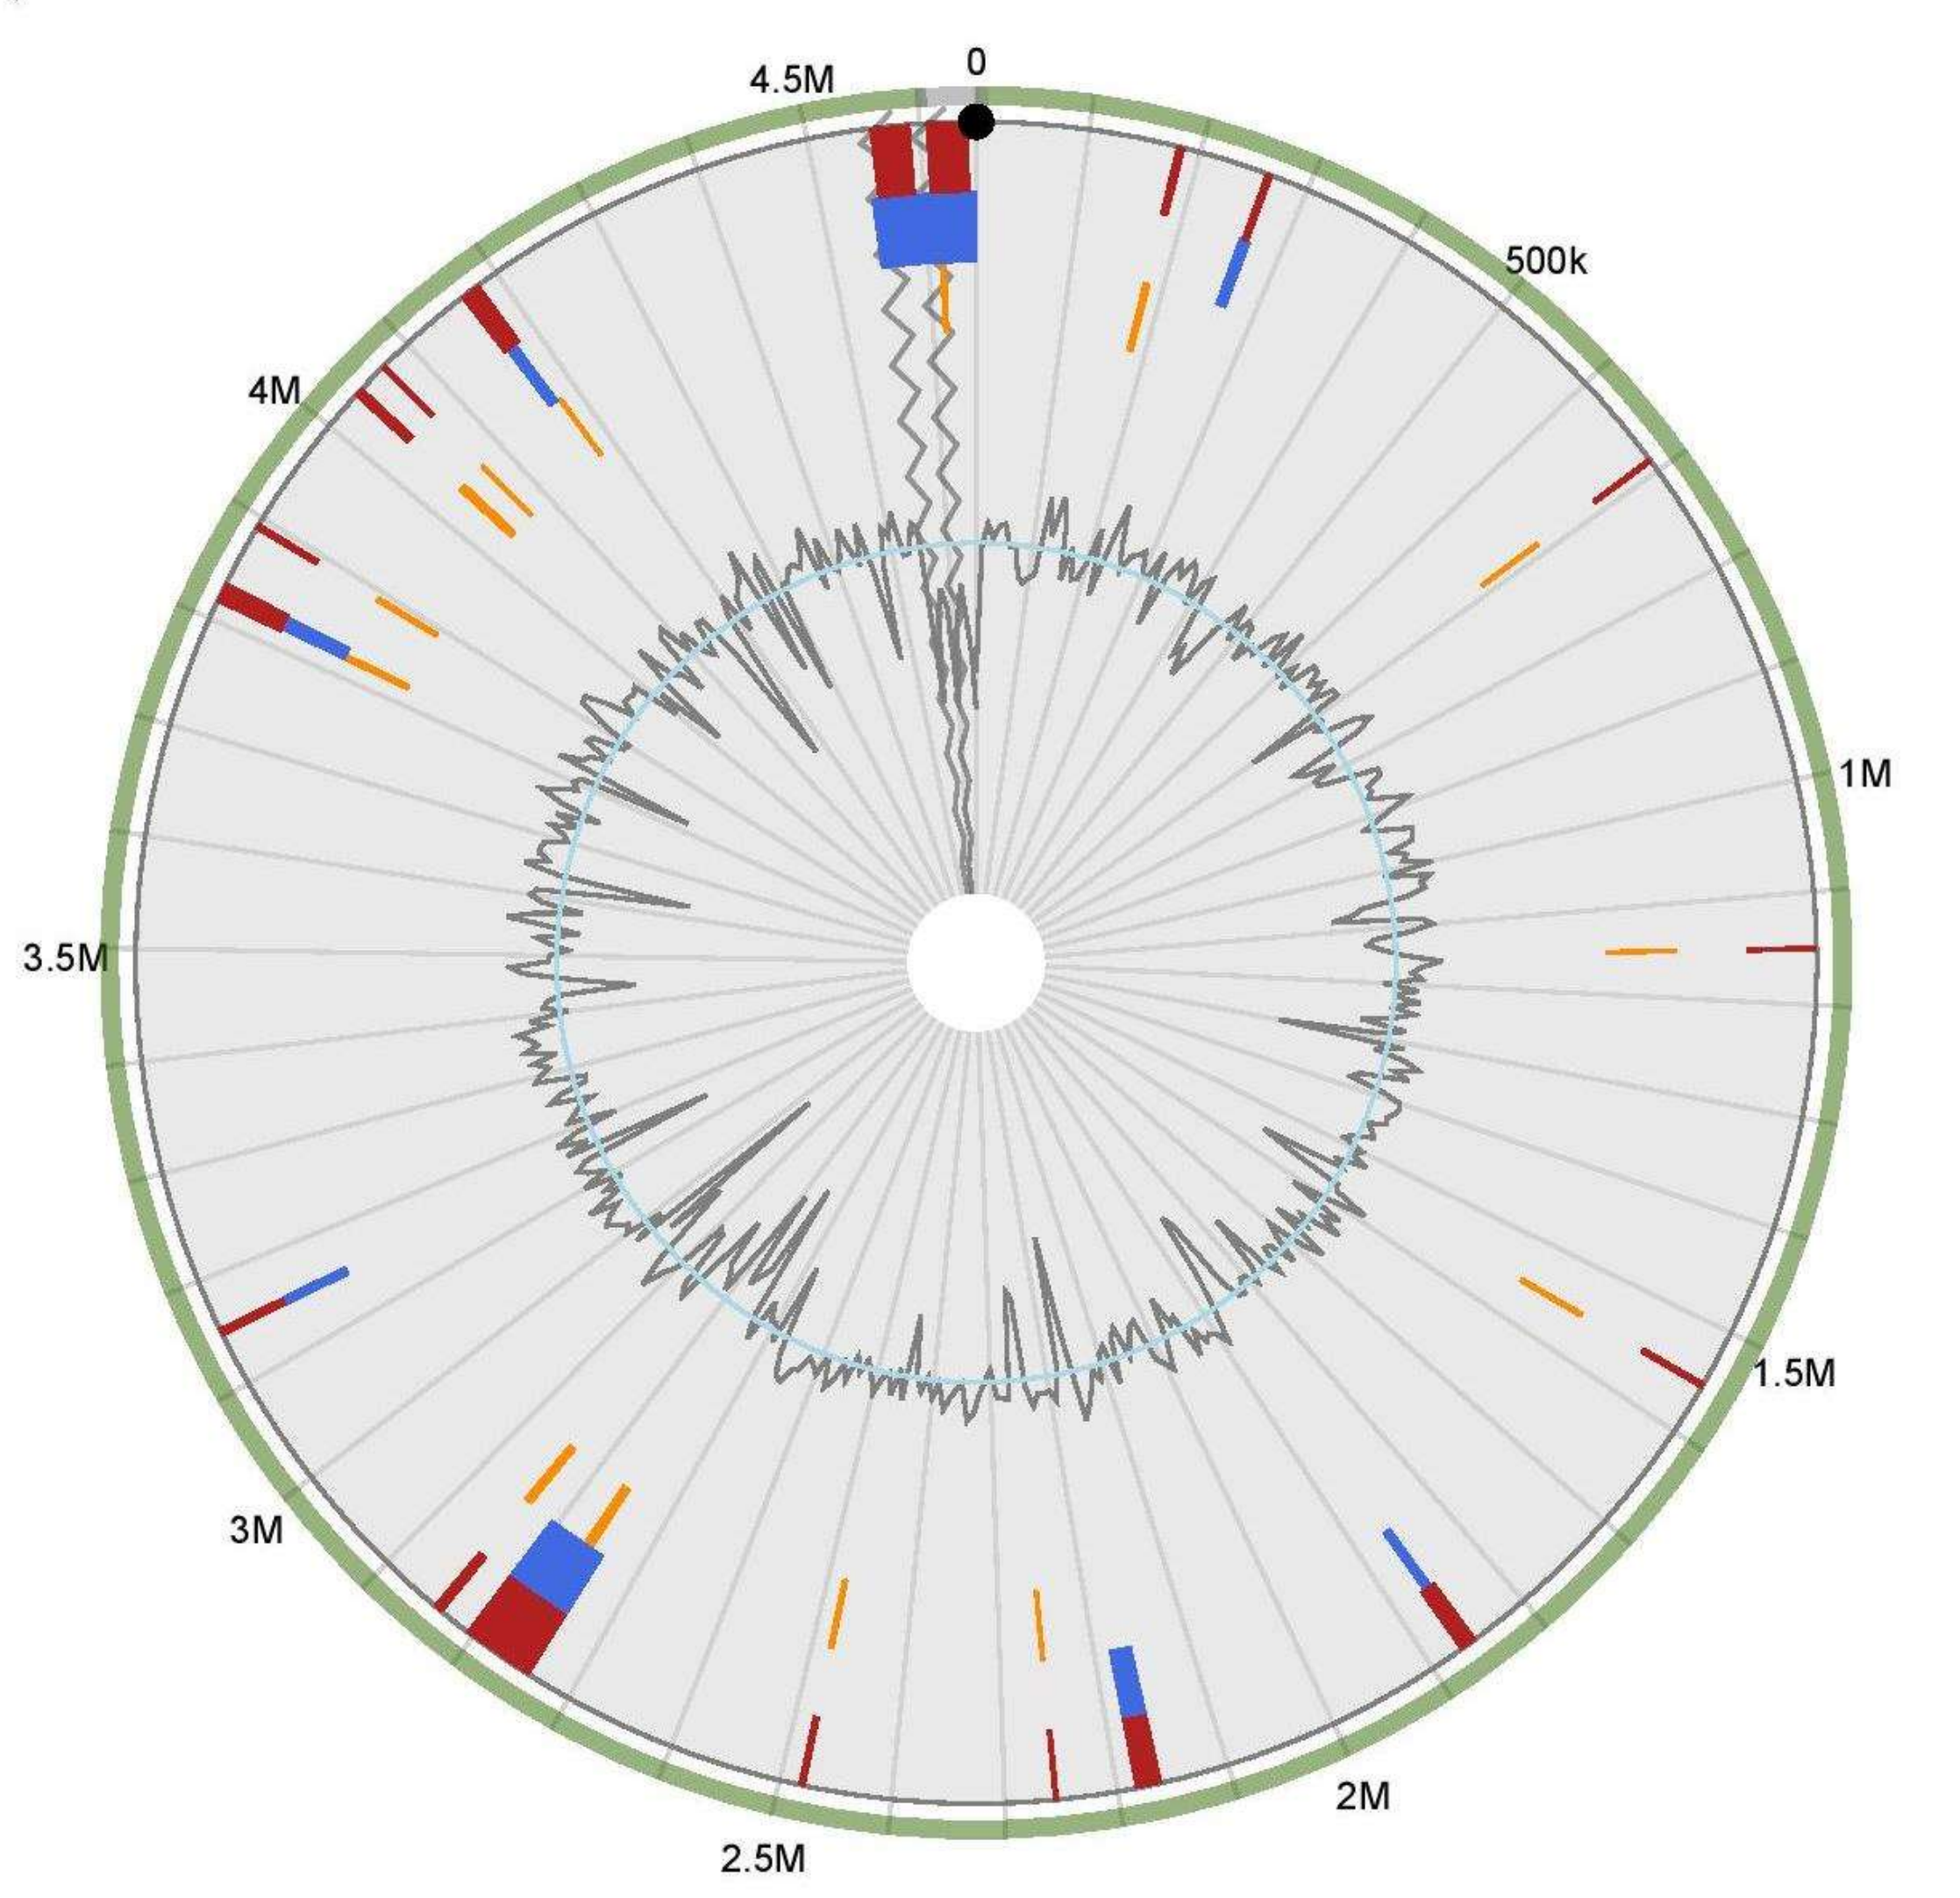

XtKm34

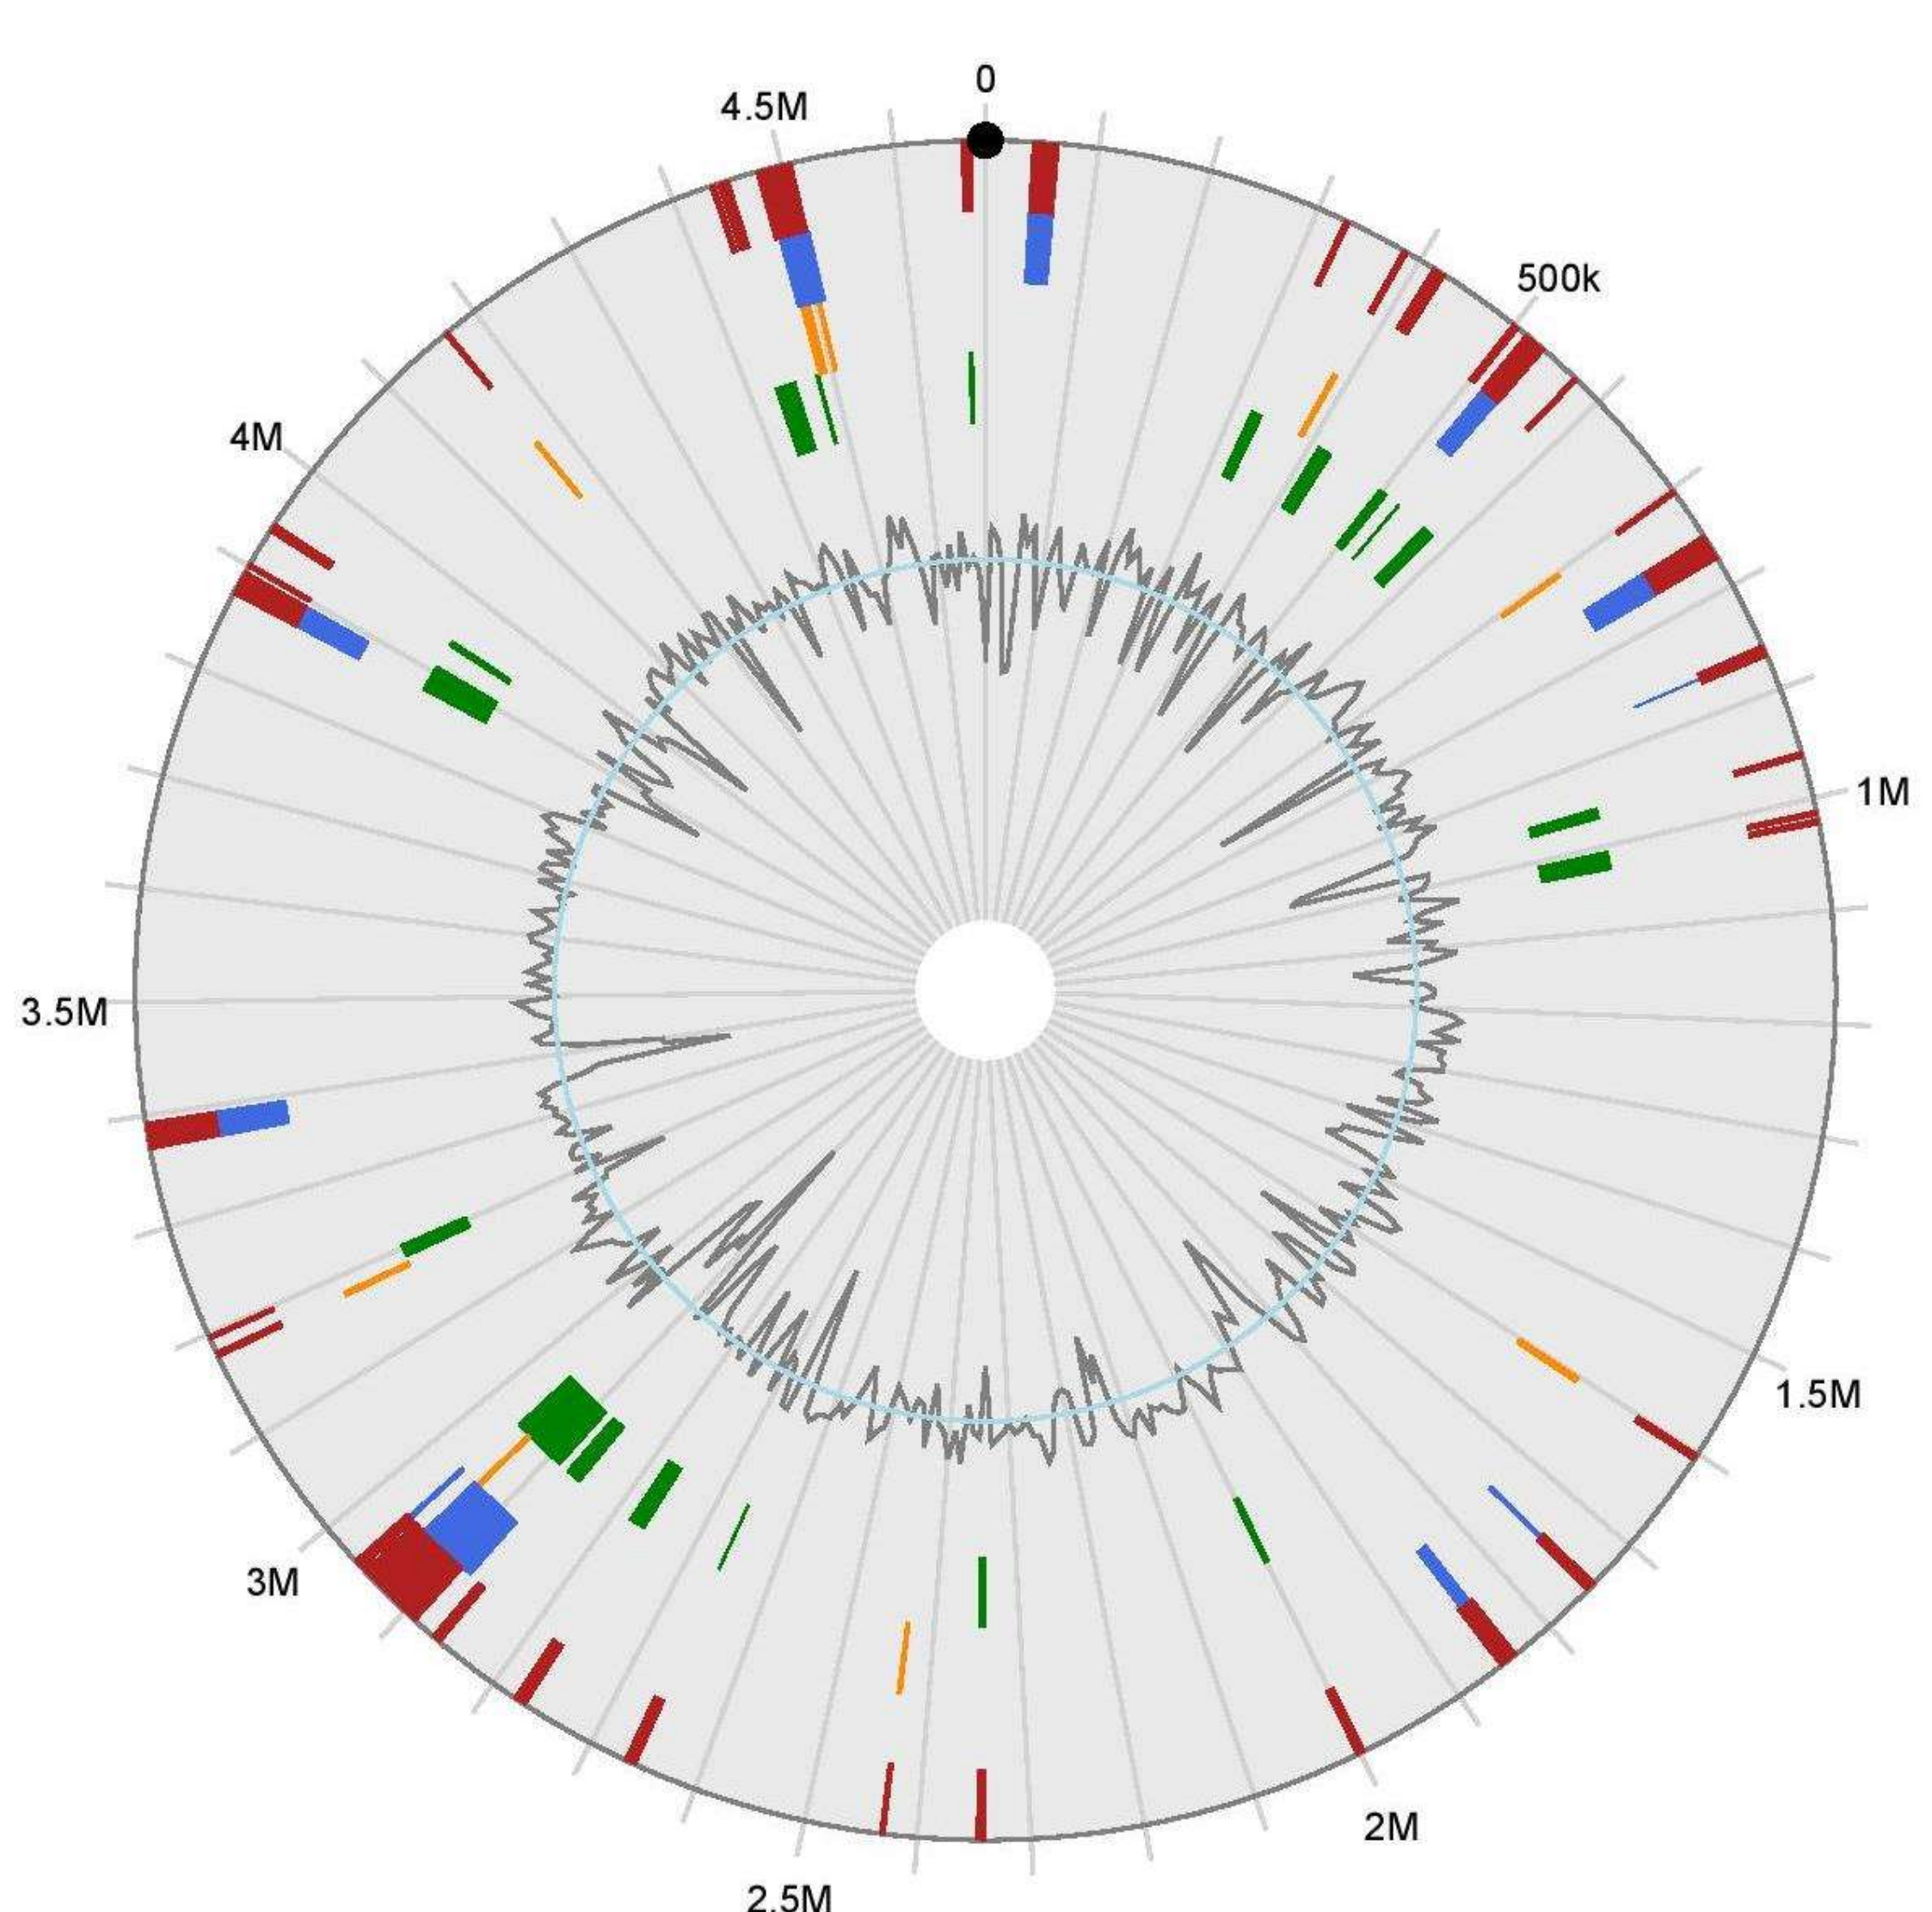

XtLr8

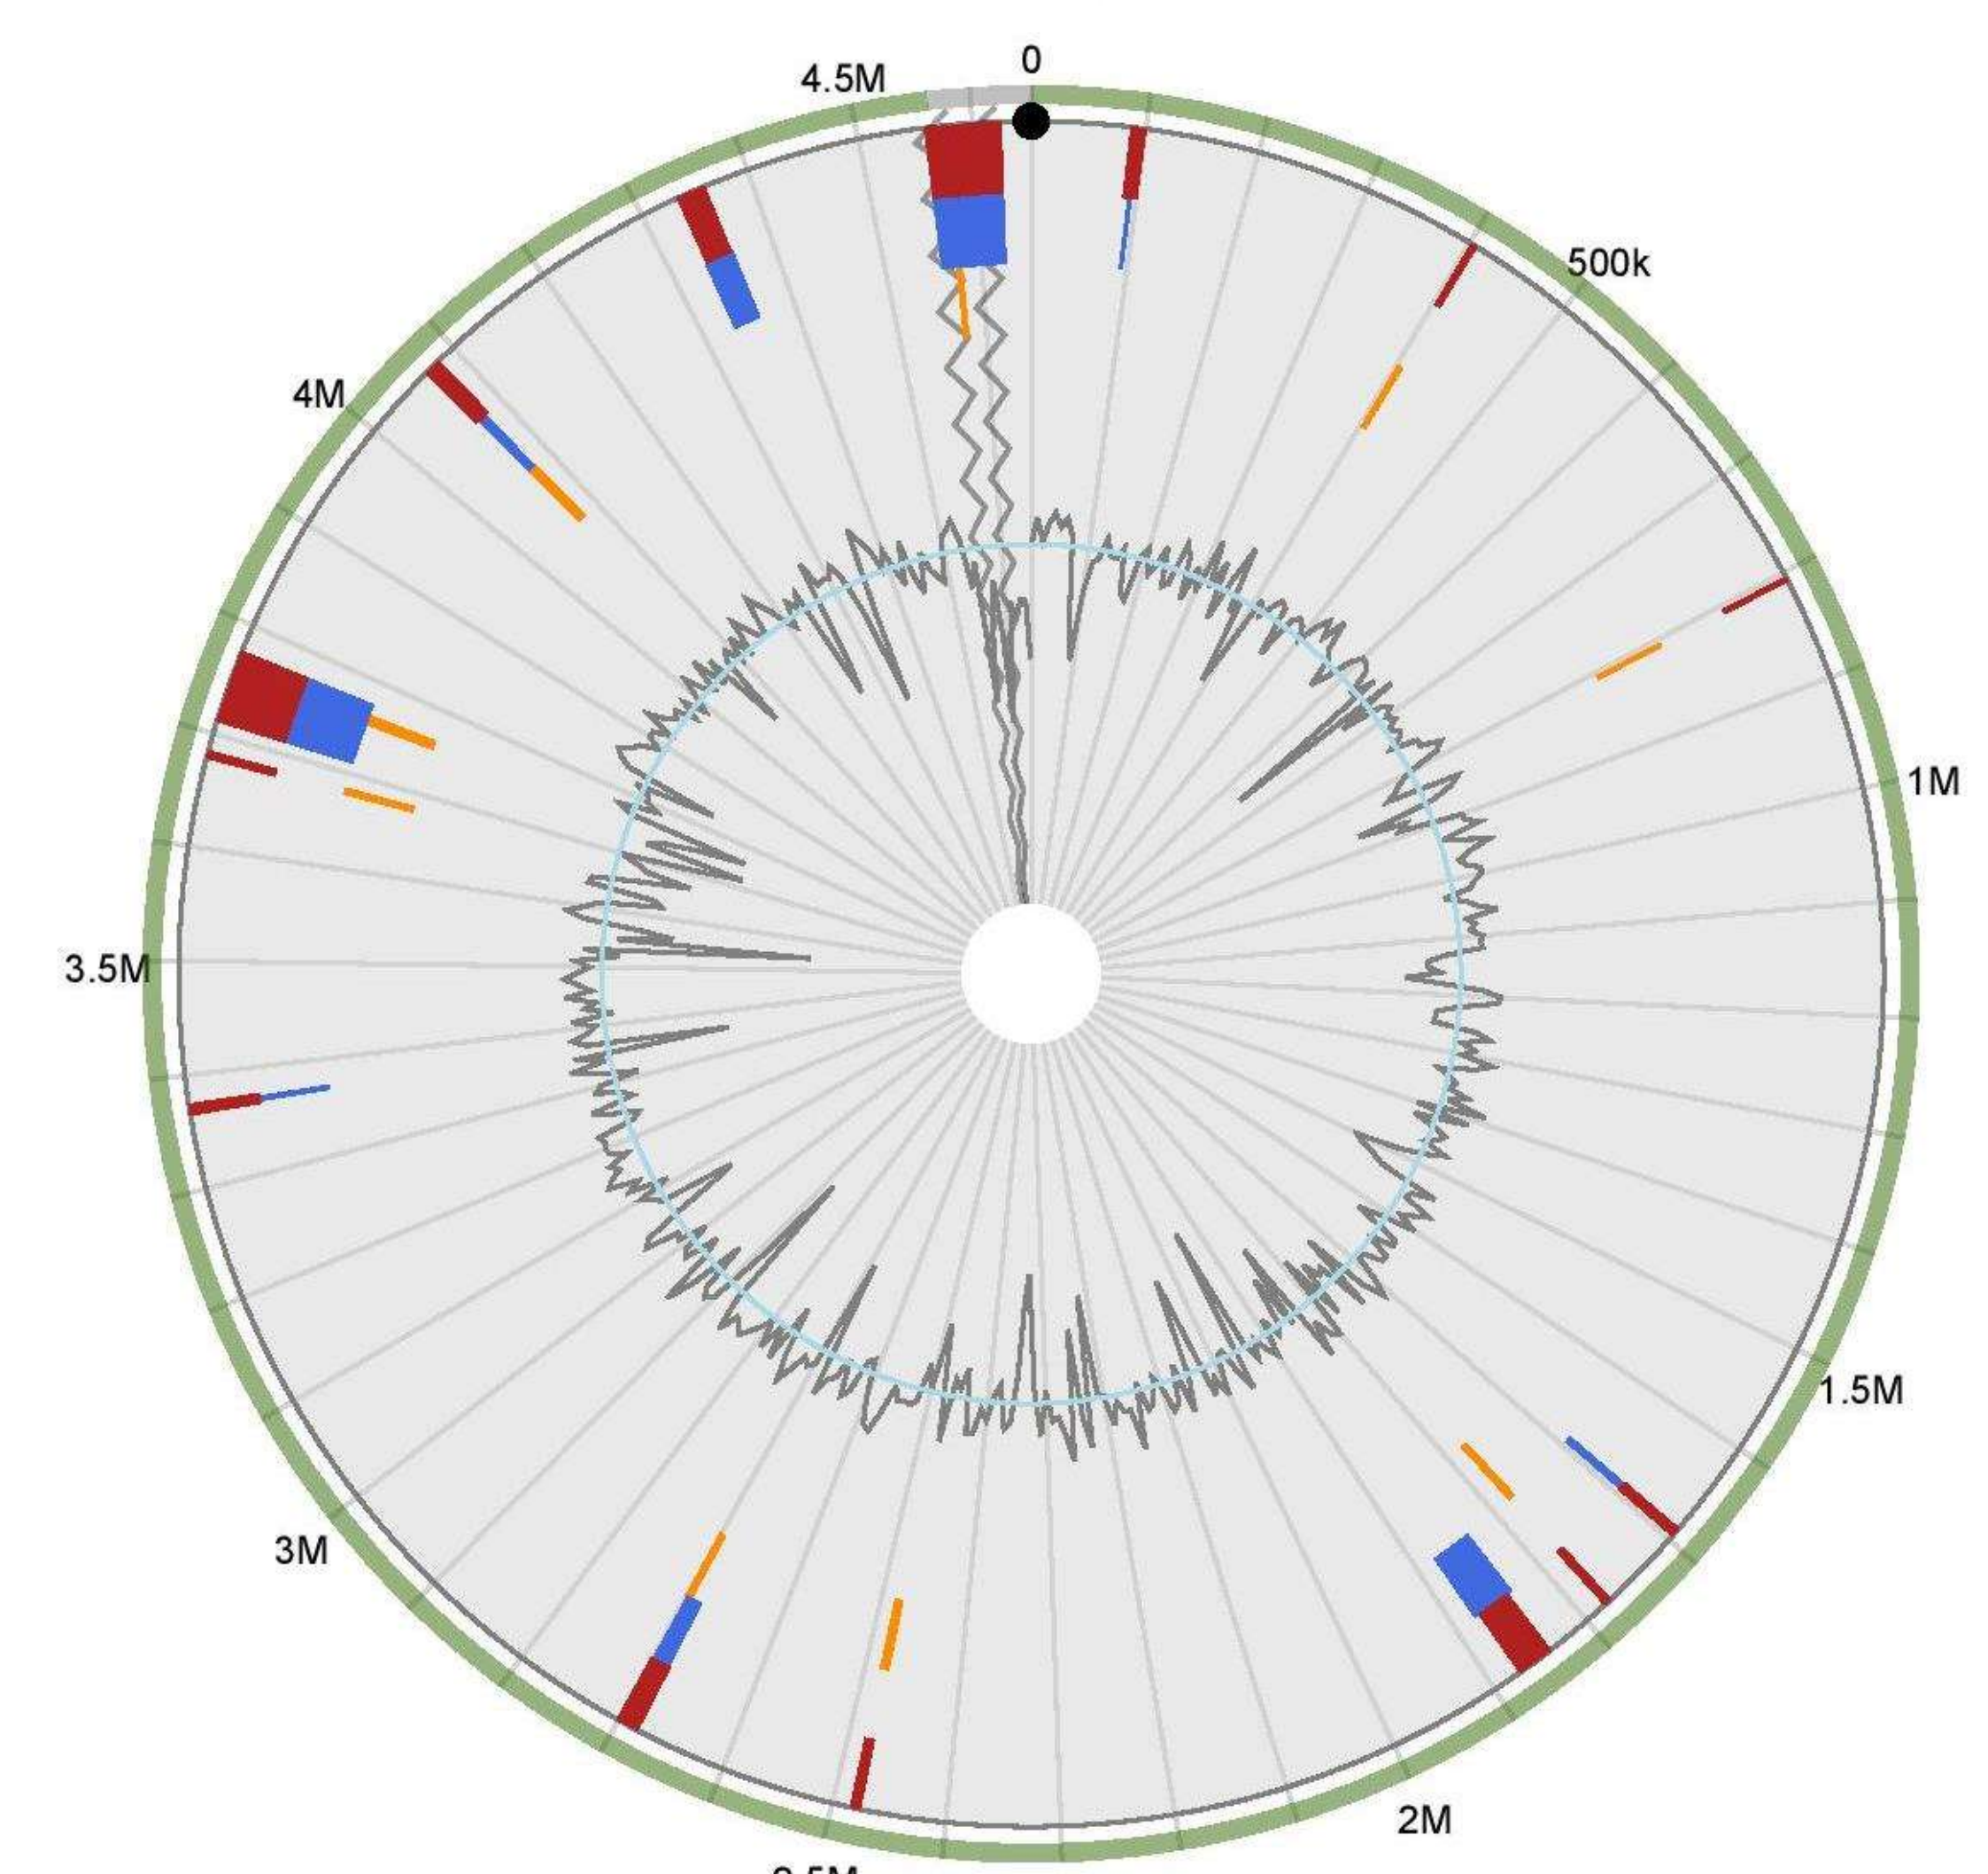

Xtu 4699

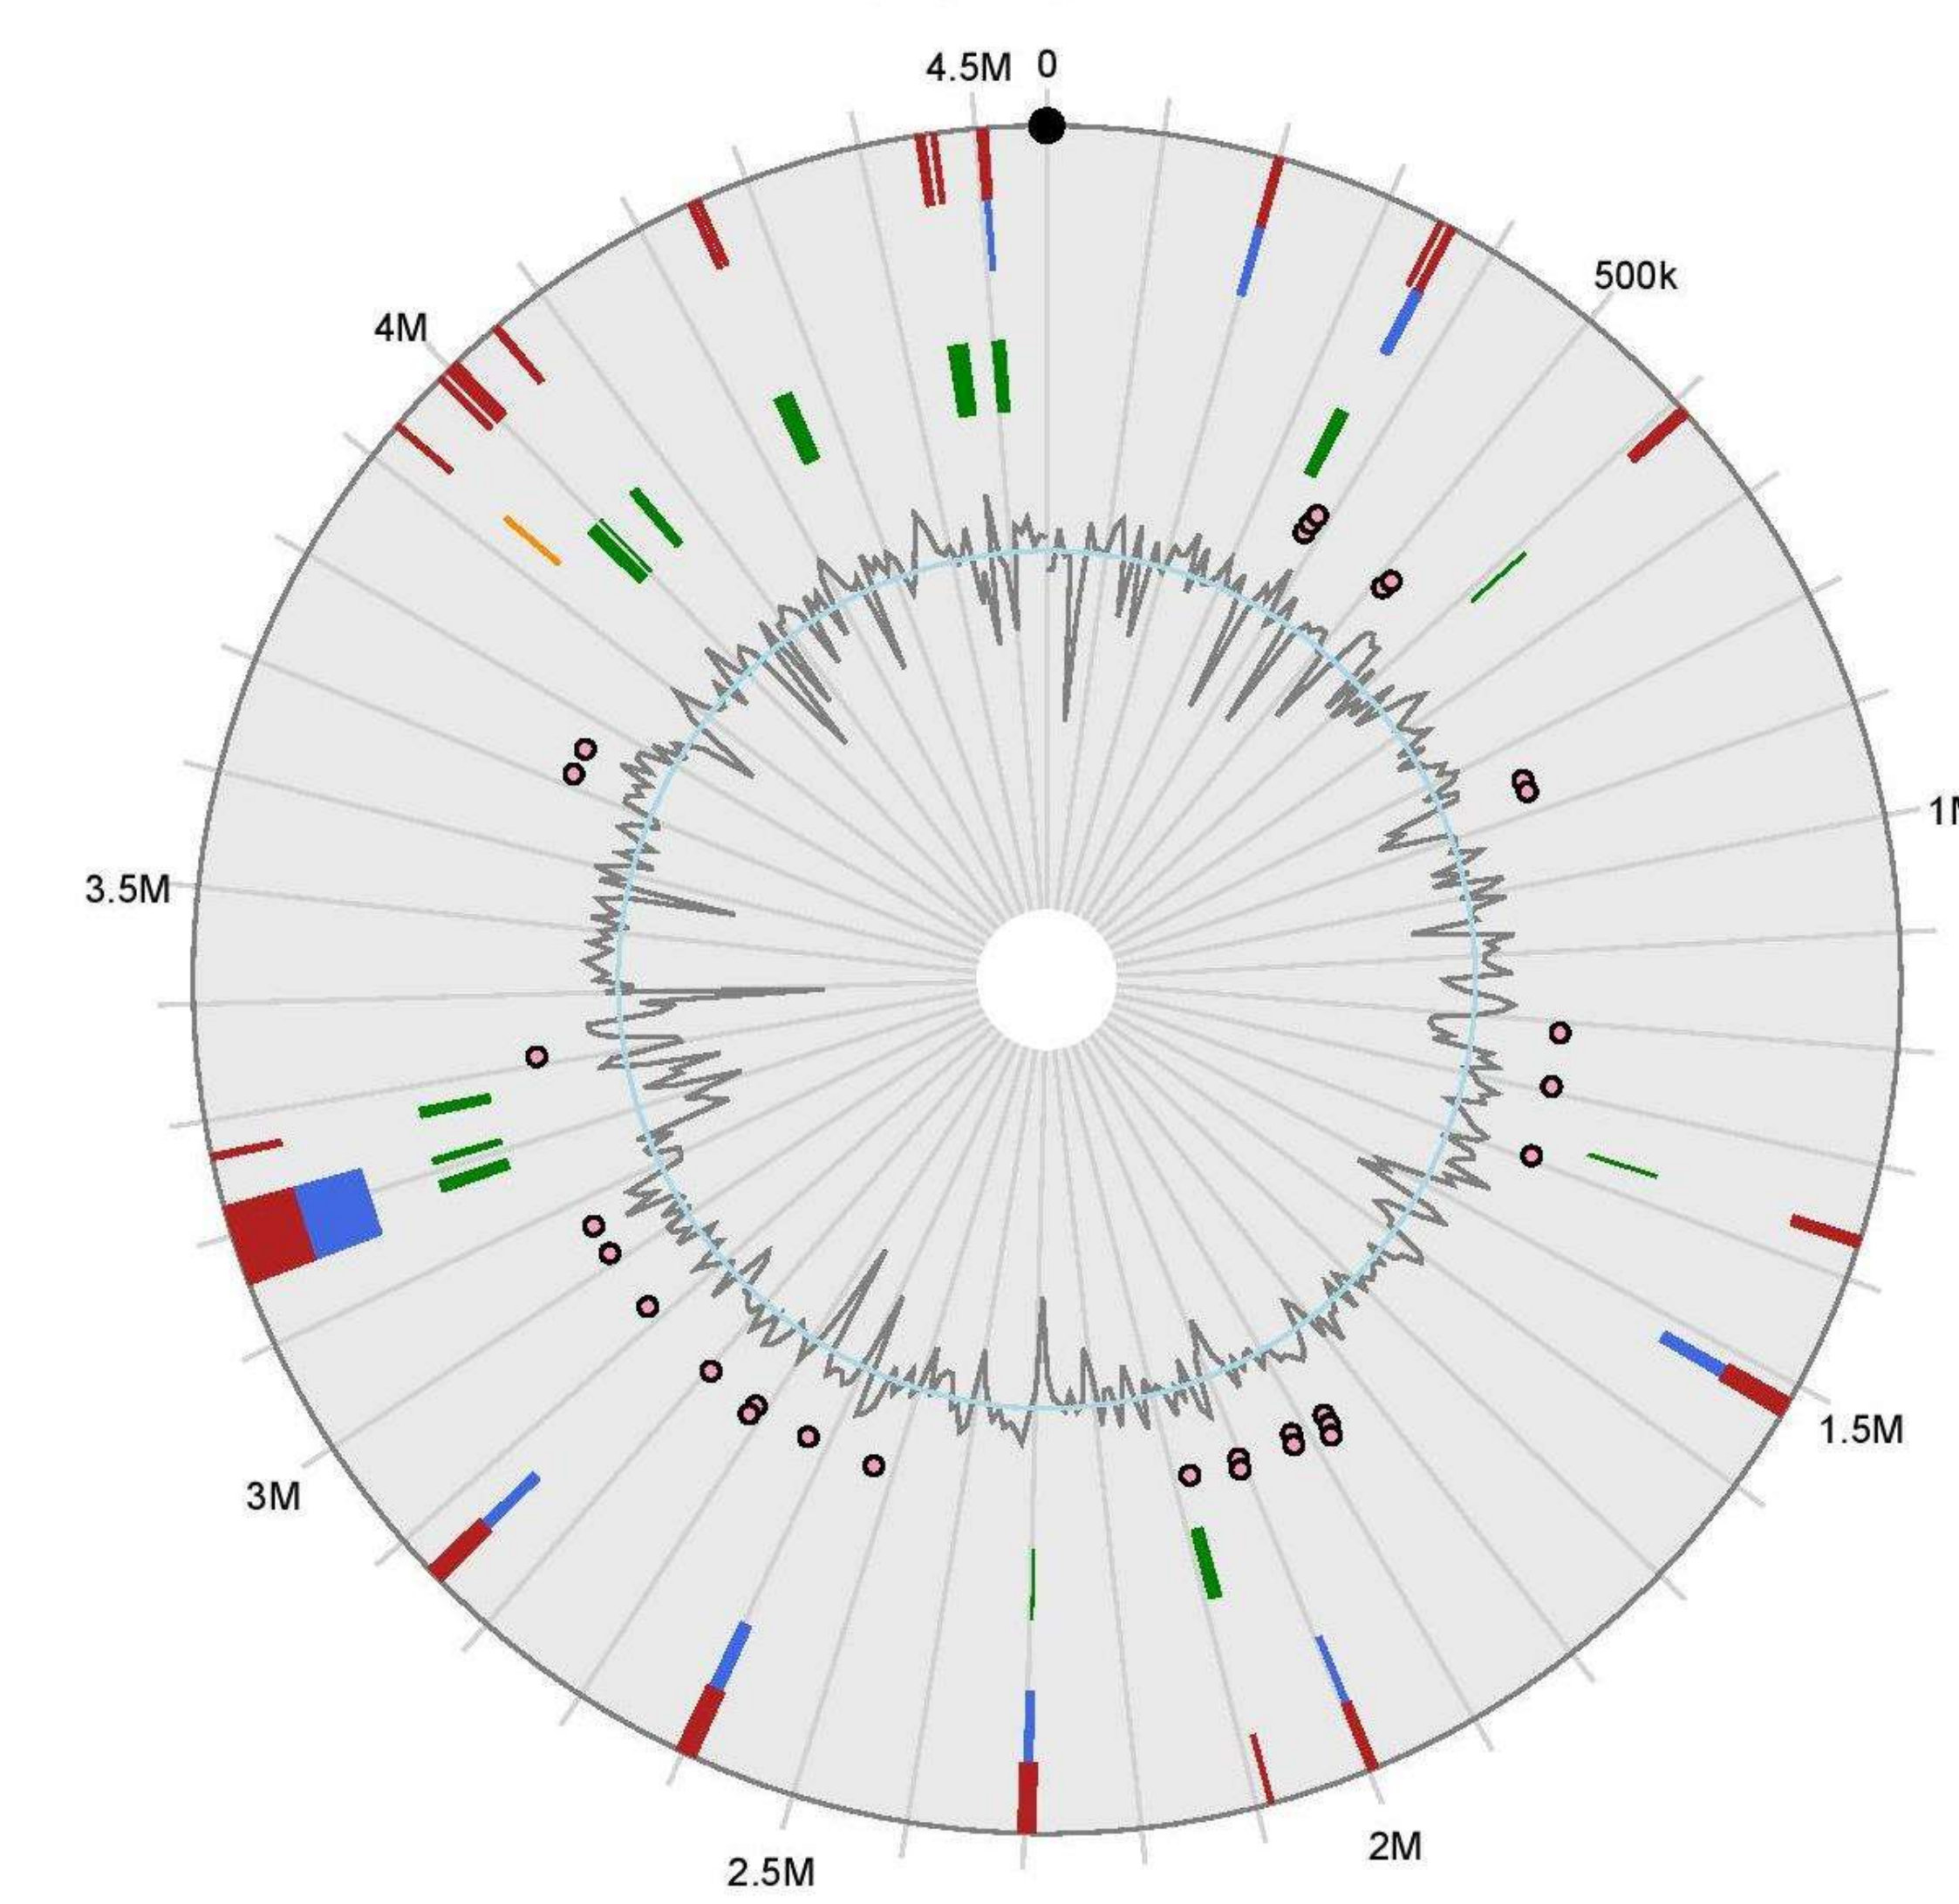

Supplement: Image_3.pdf [file Image_3.pdf]
