# Supplementary material for: Genomics-Enabled Novel Insight Into the Pathovar-Specific Population Structure of the Bacterial Leaf Streak Pathogen Xanthomonas translucens in Small Grain Cereals
Source: PubMed Central journal article supplement (PMC8195340; doi:10.3389/fmicb.2021.674952), 2021-05-28

**A**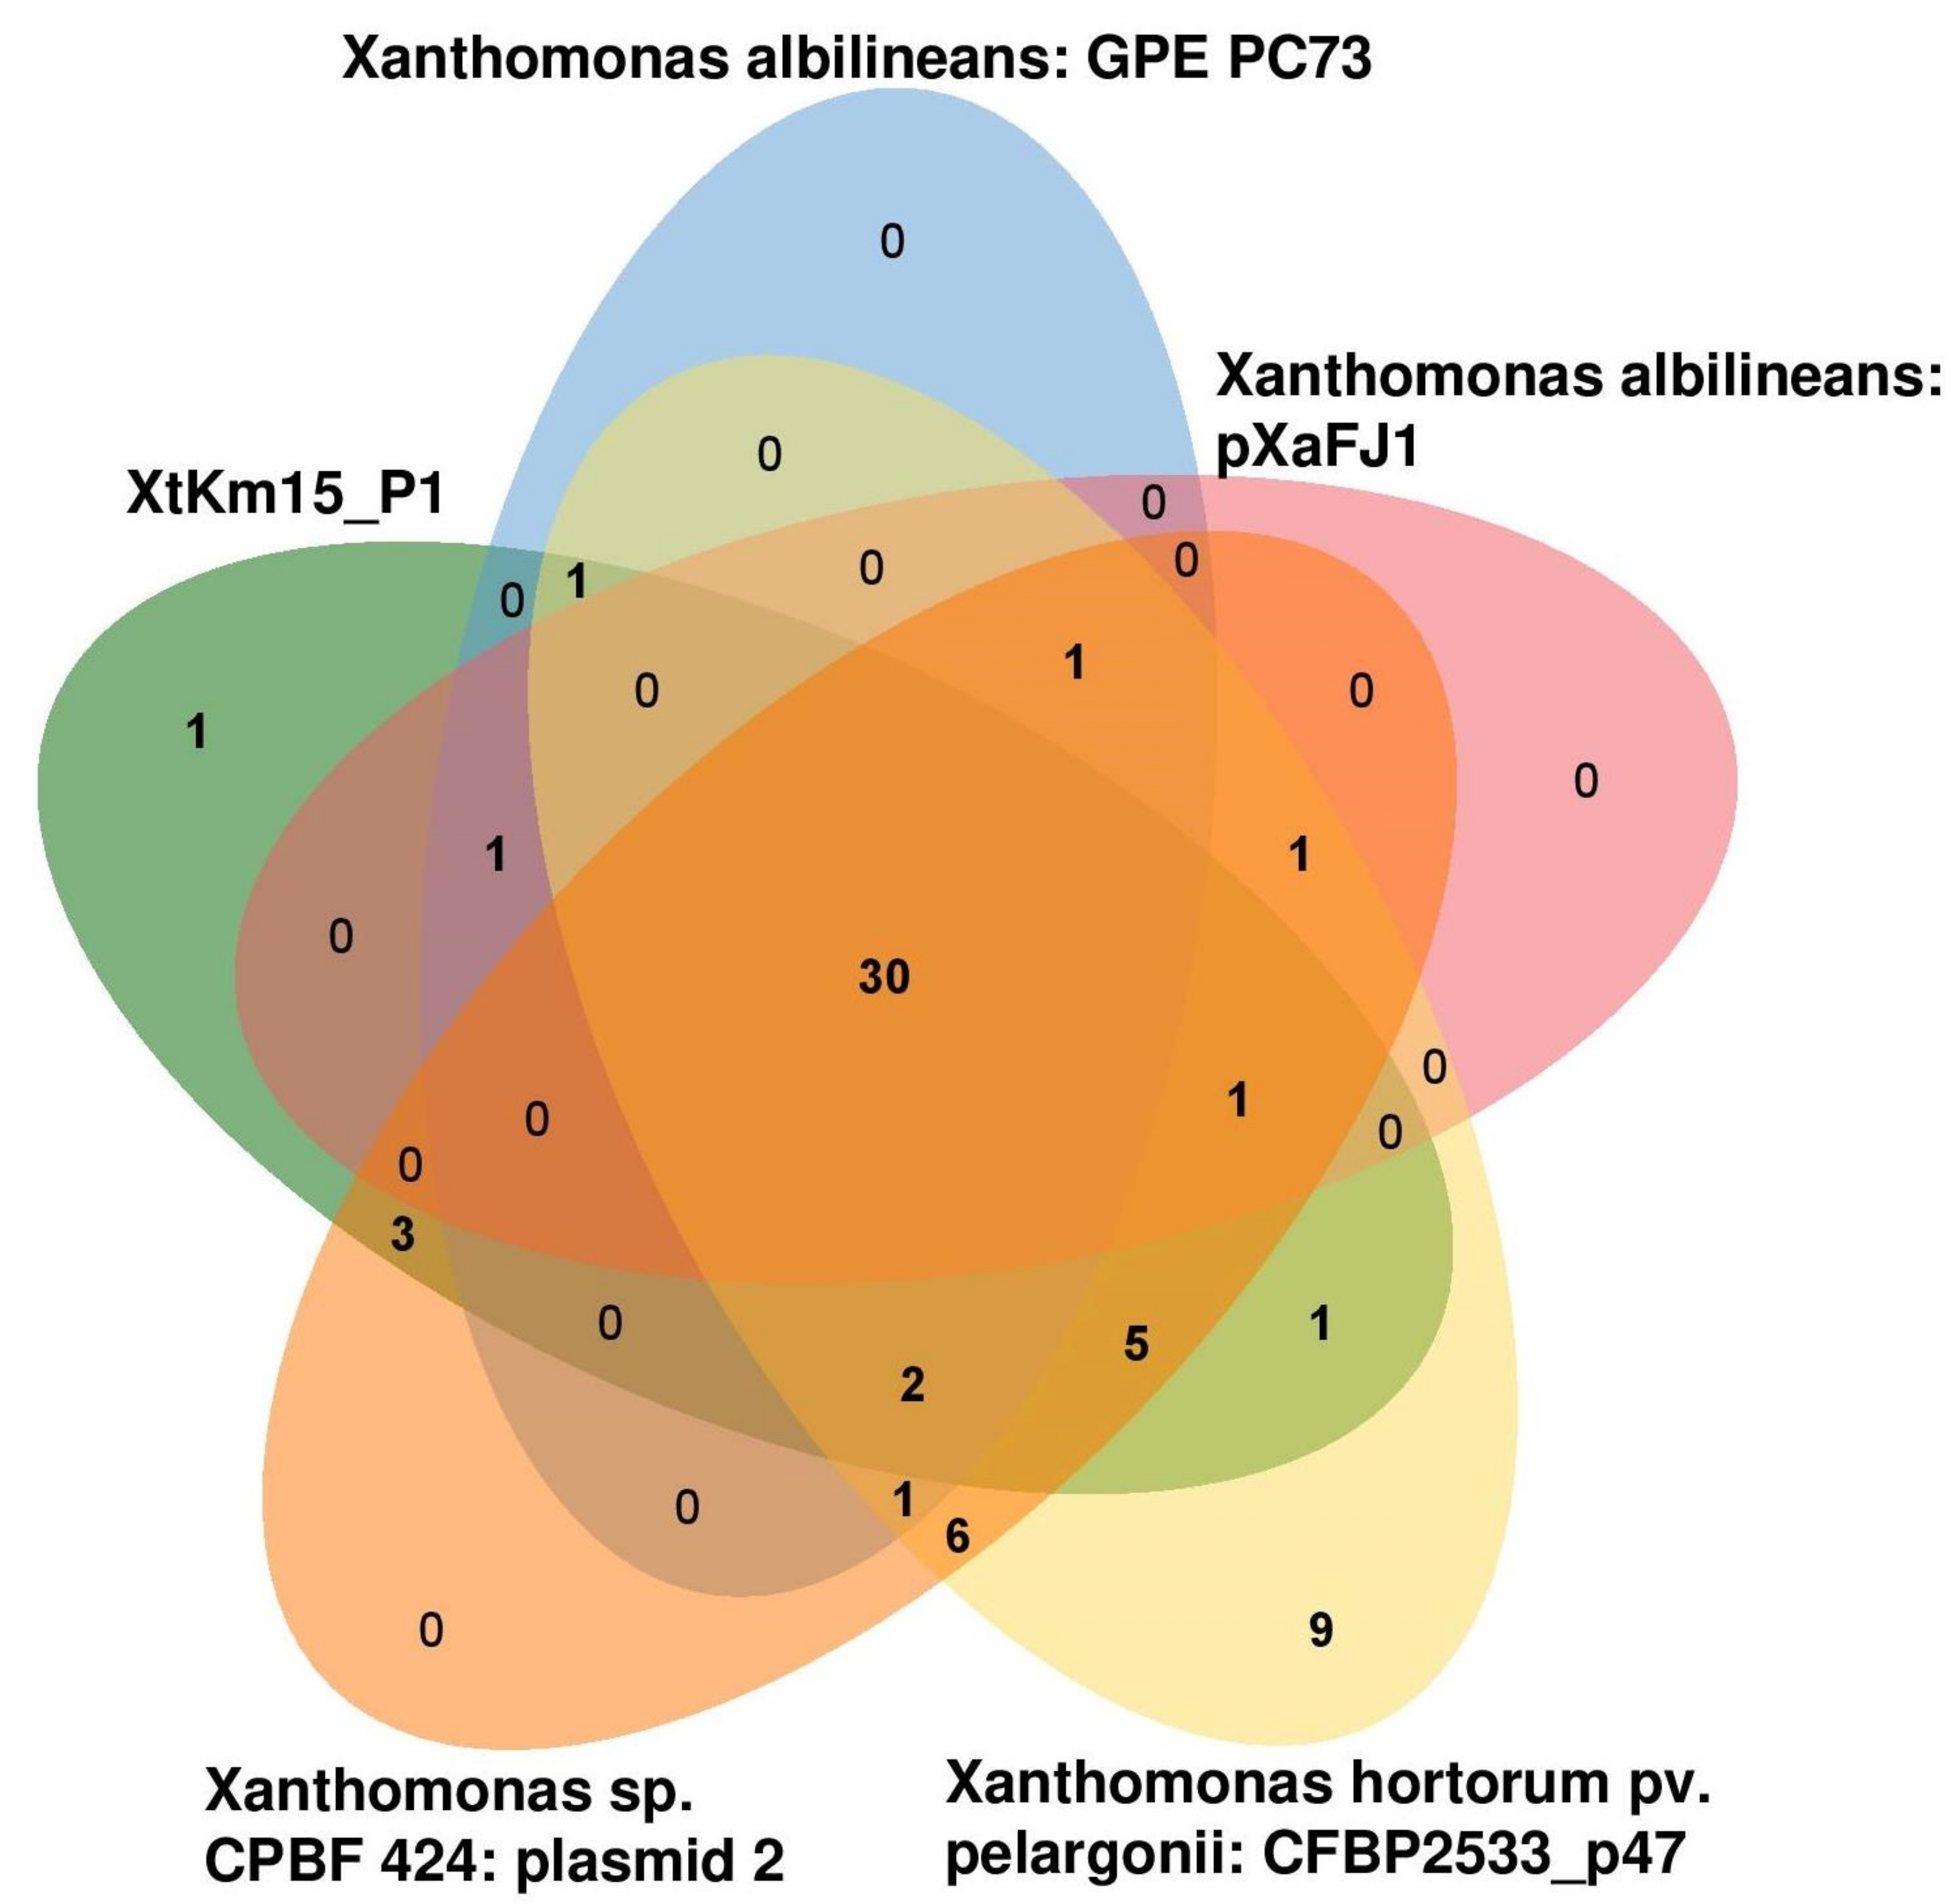**B**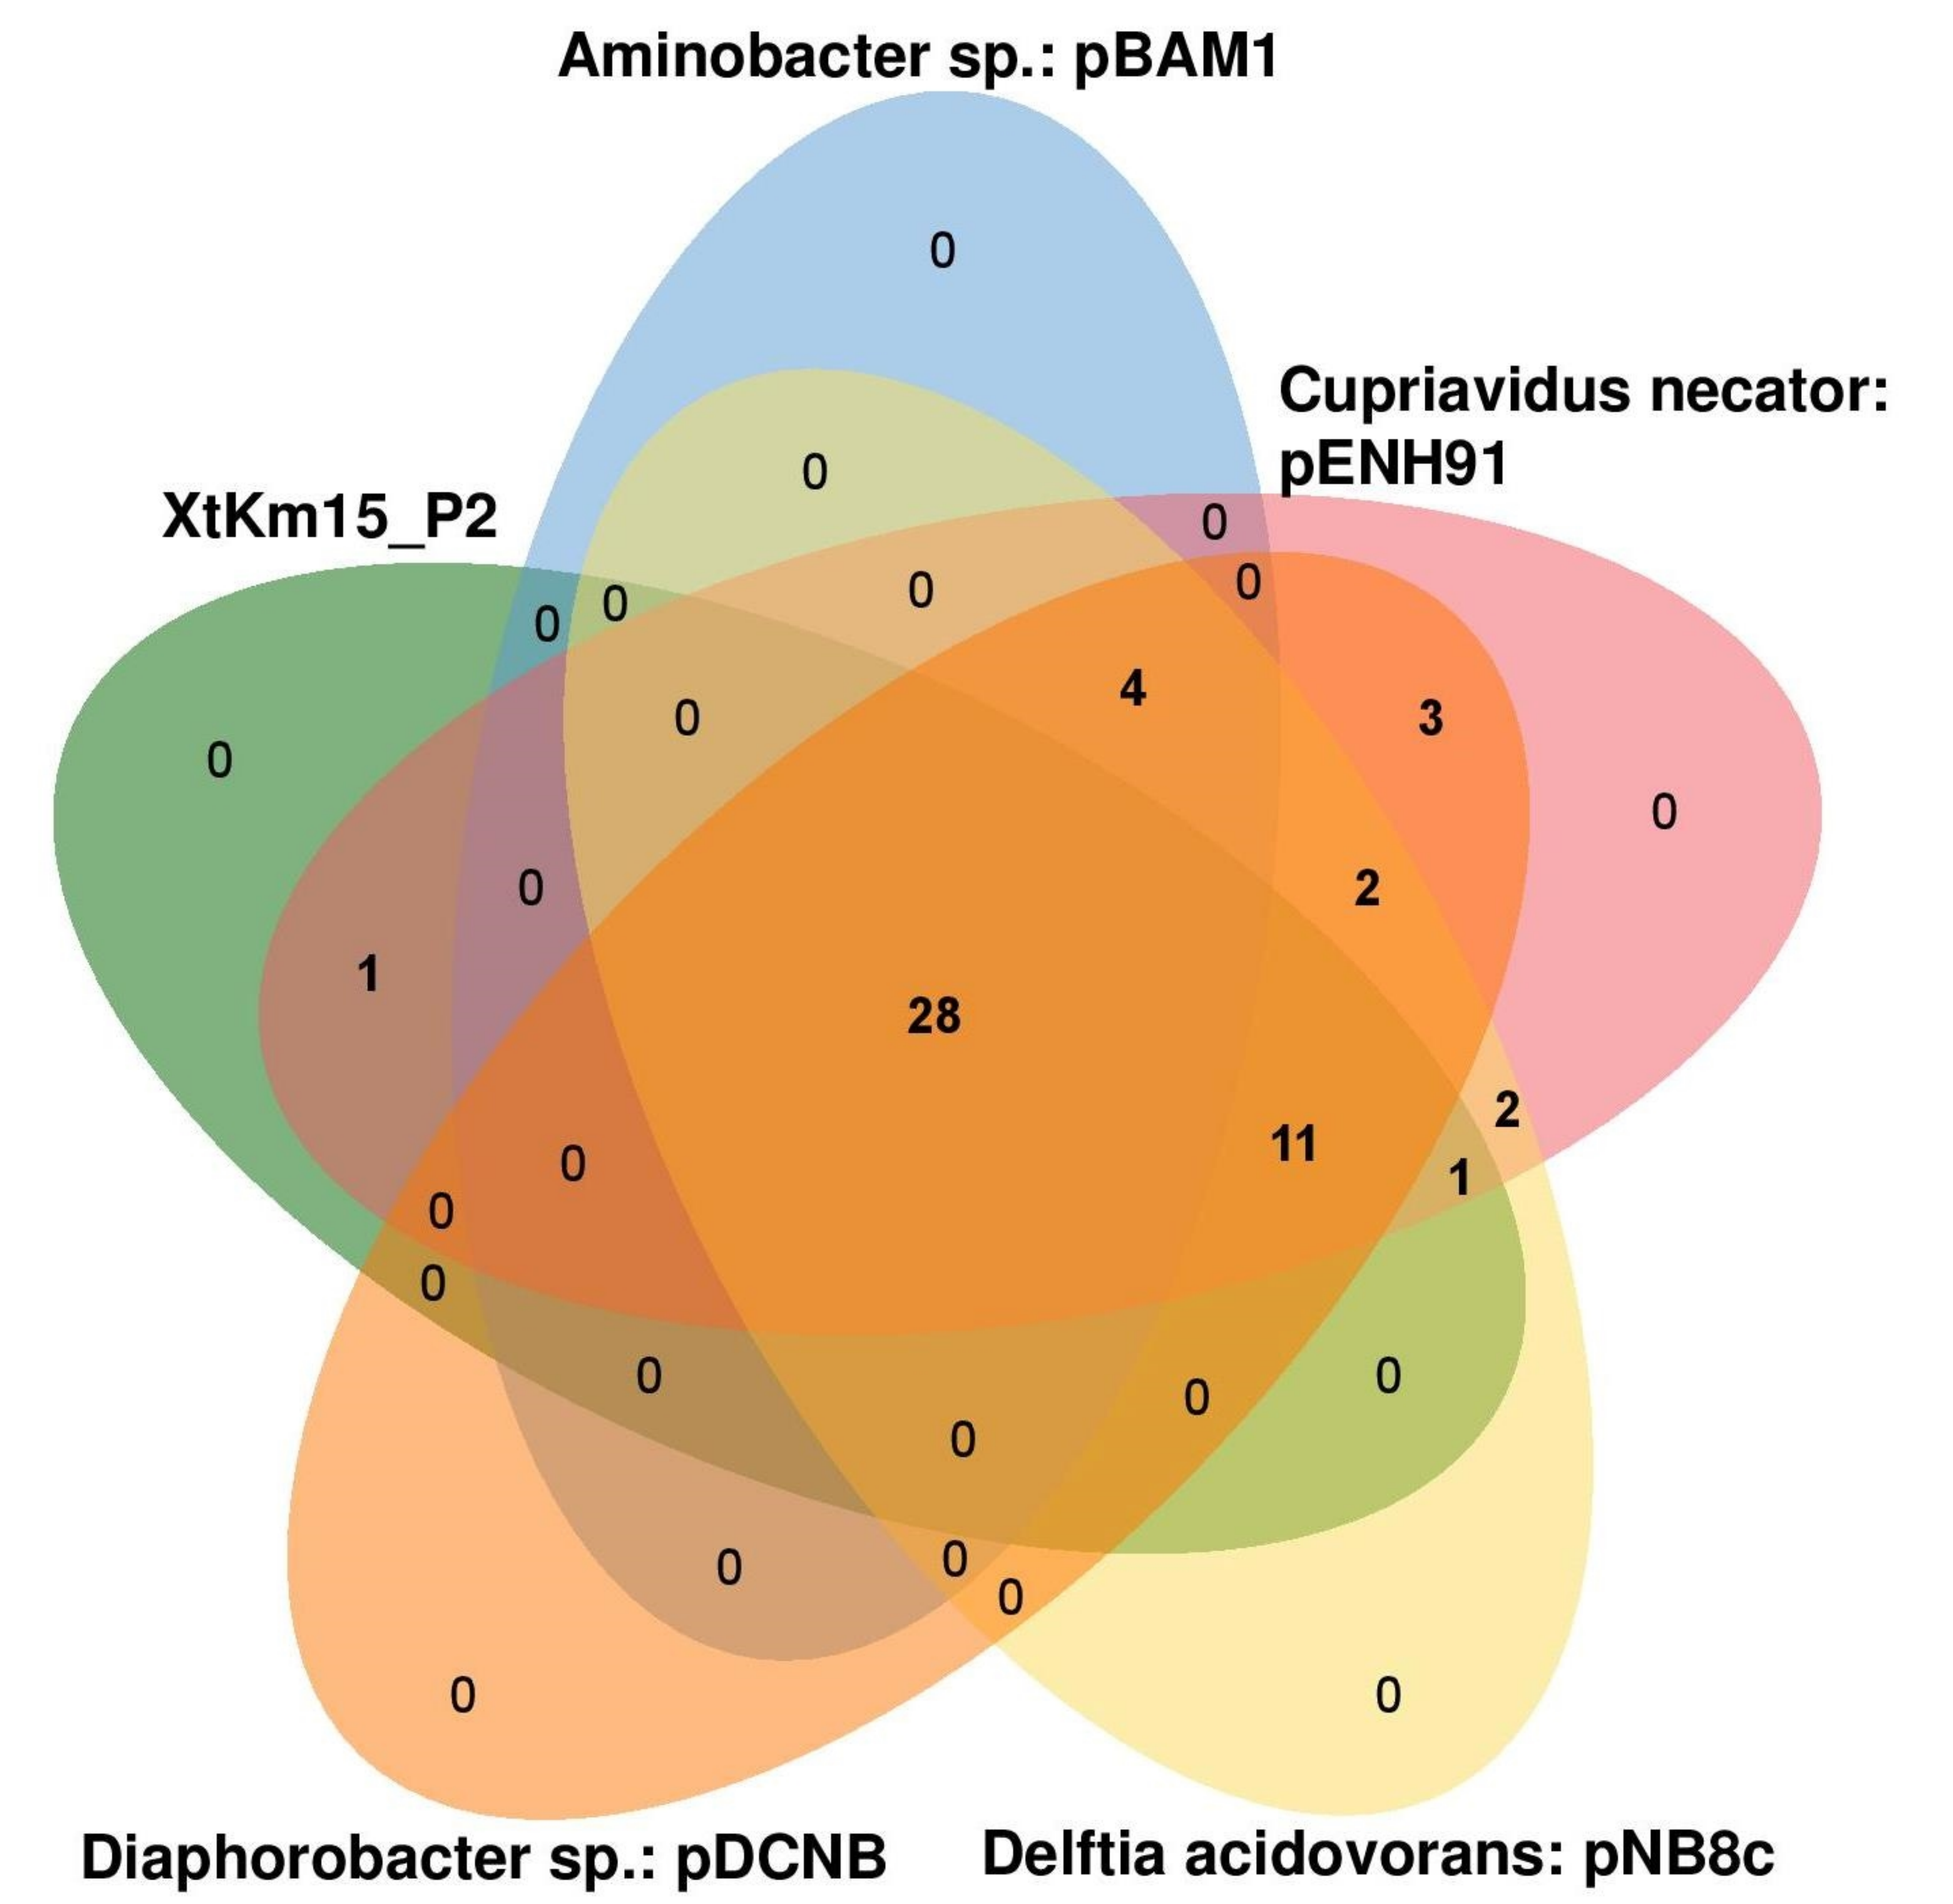**C**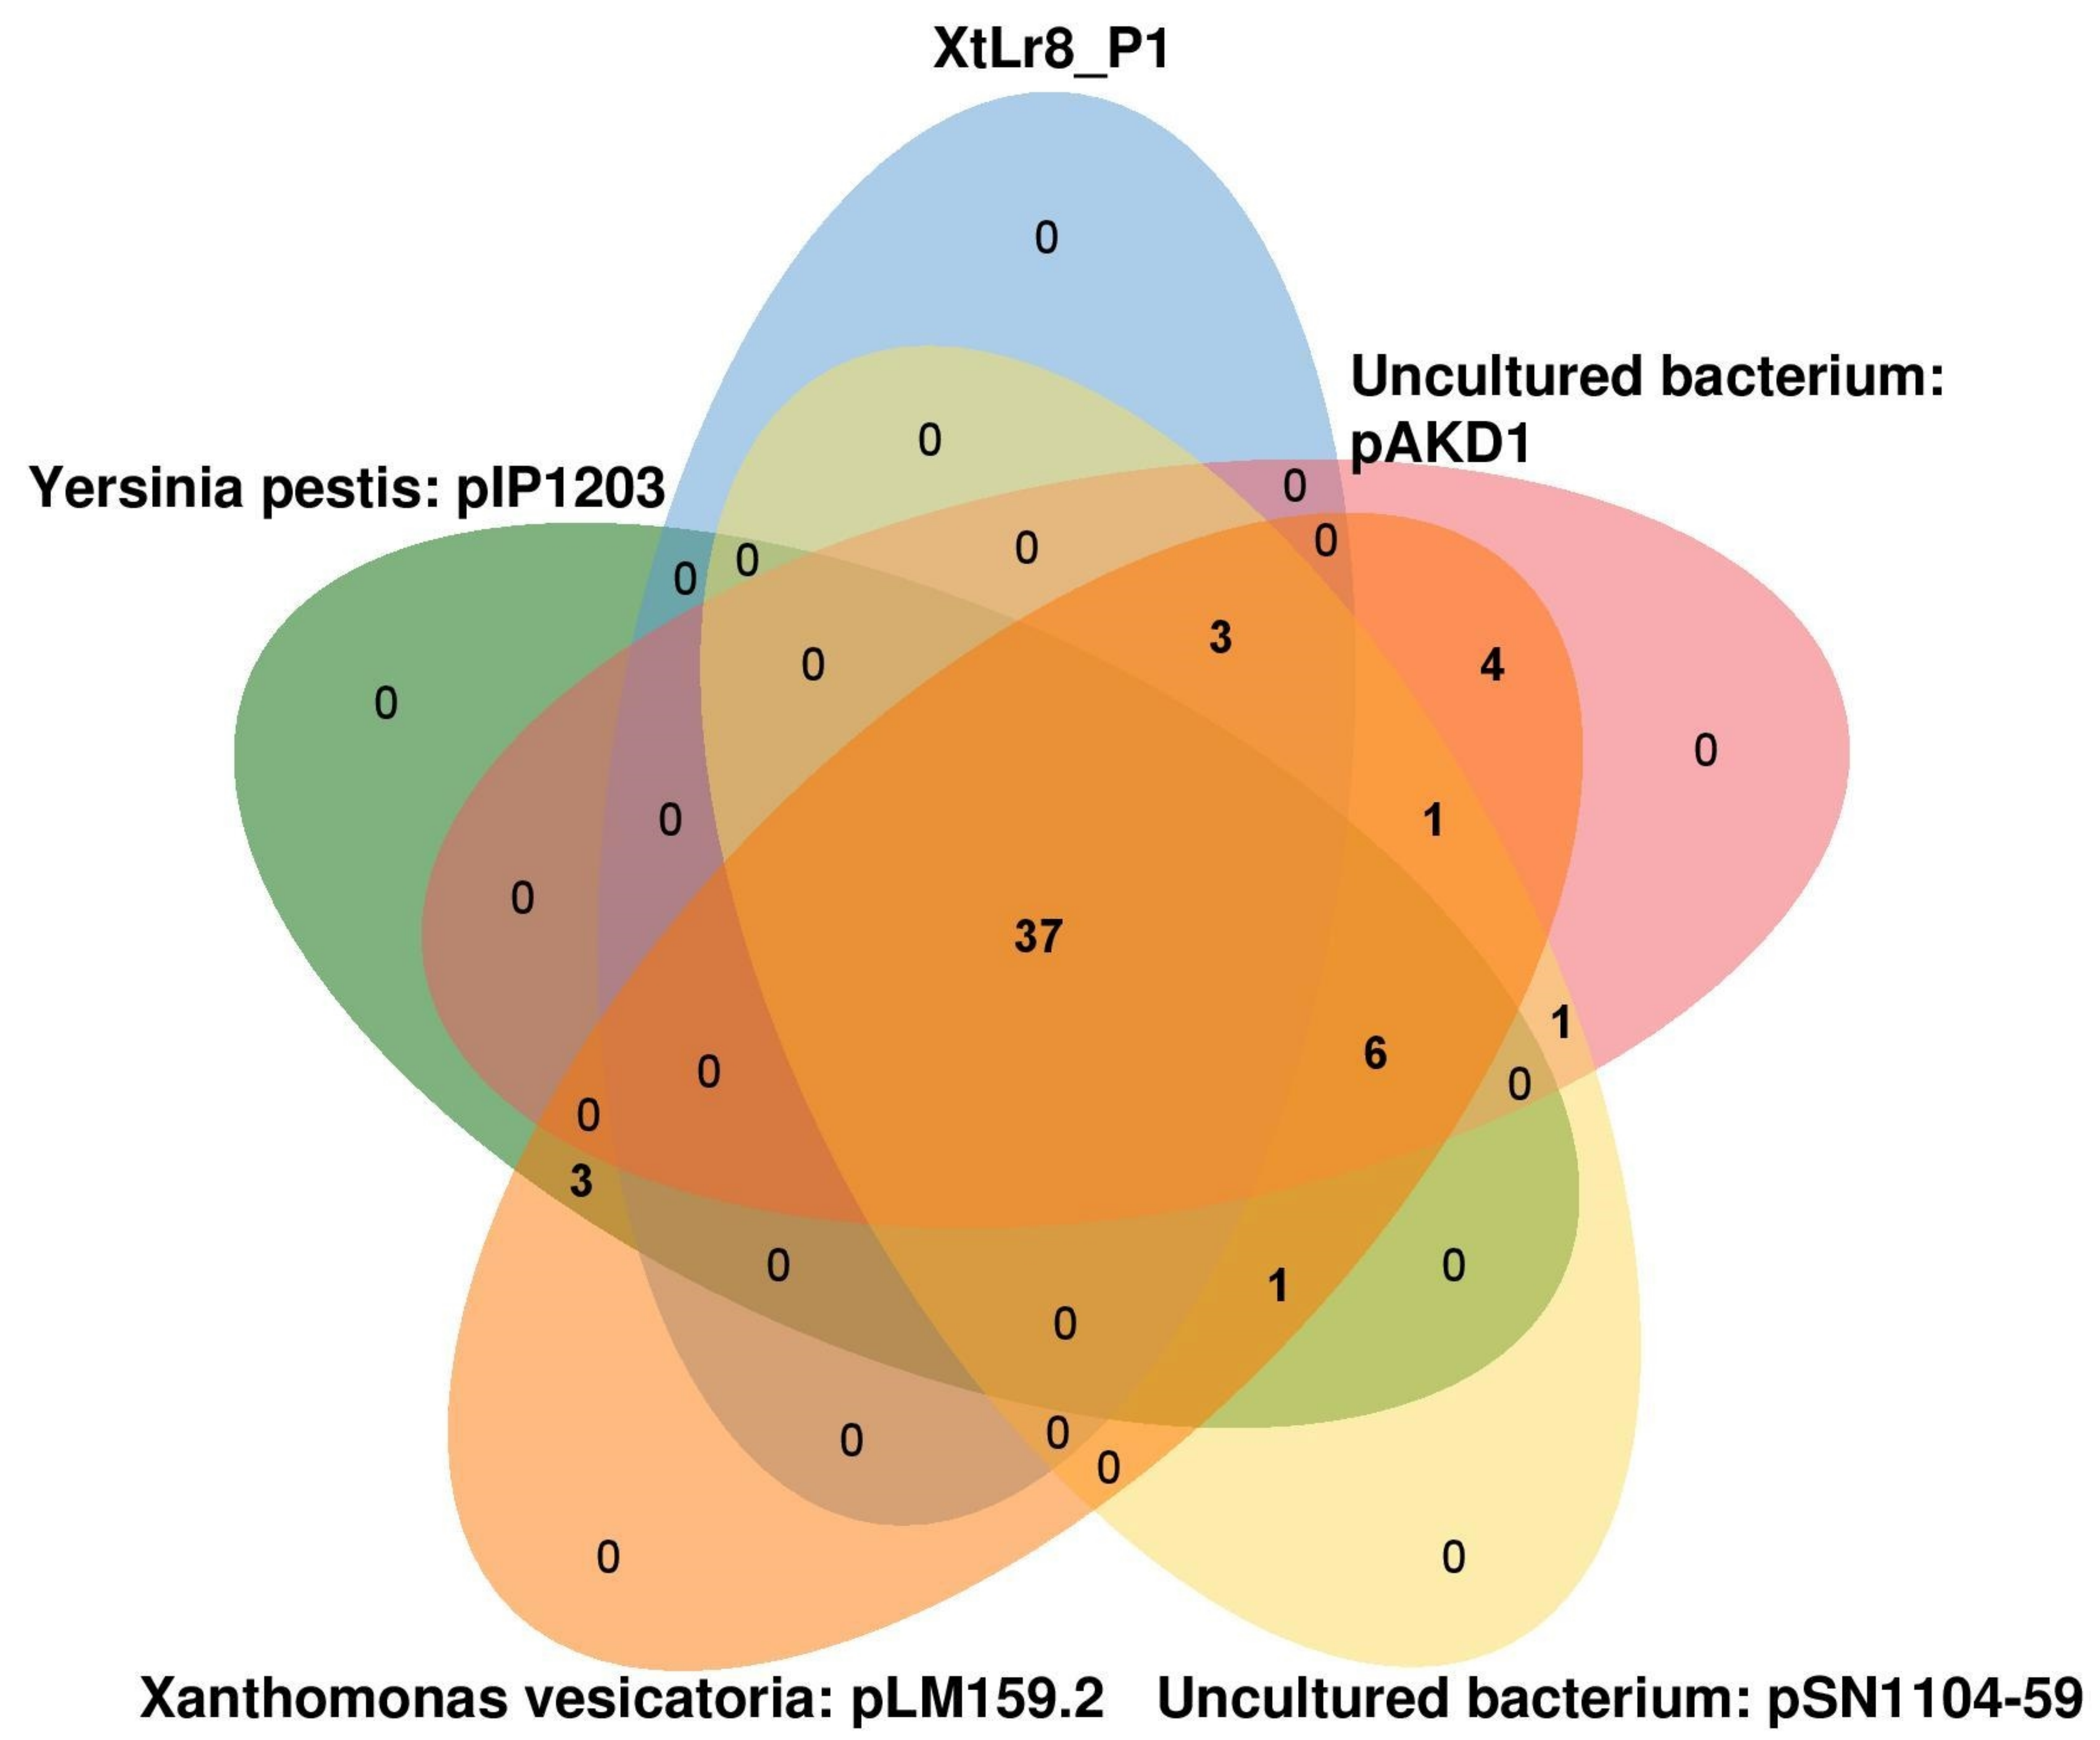**D**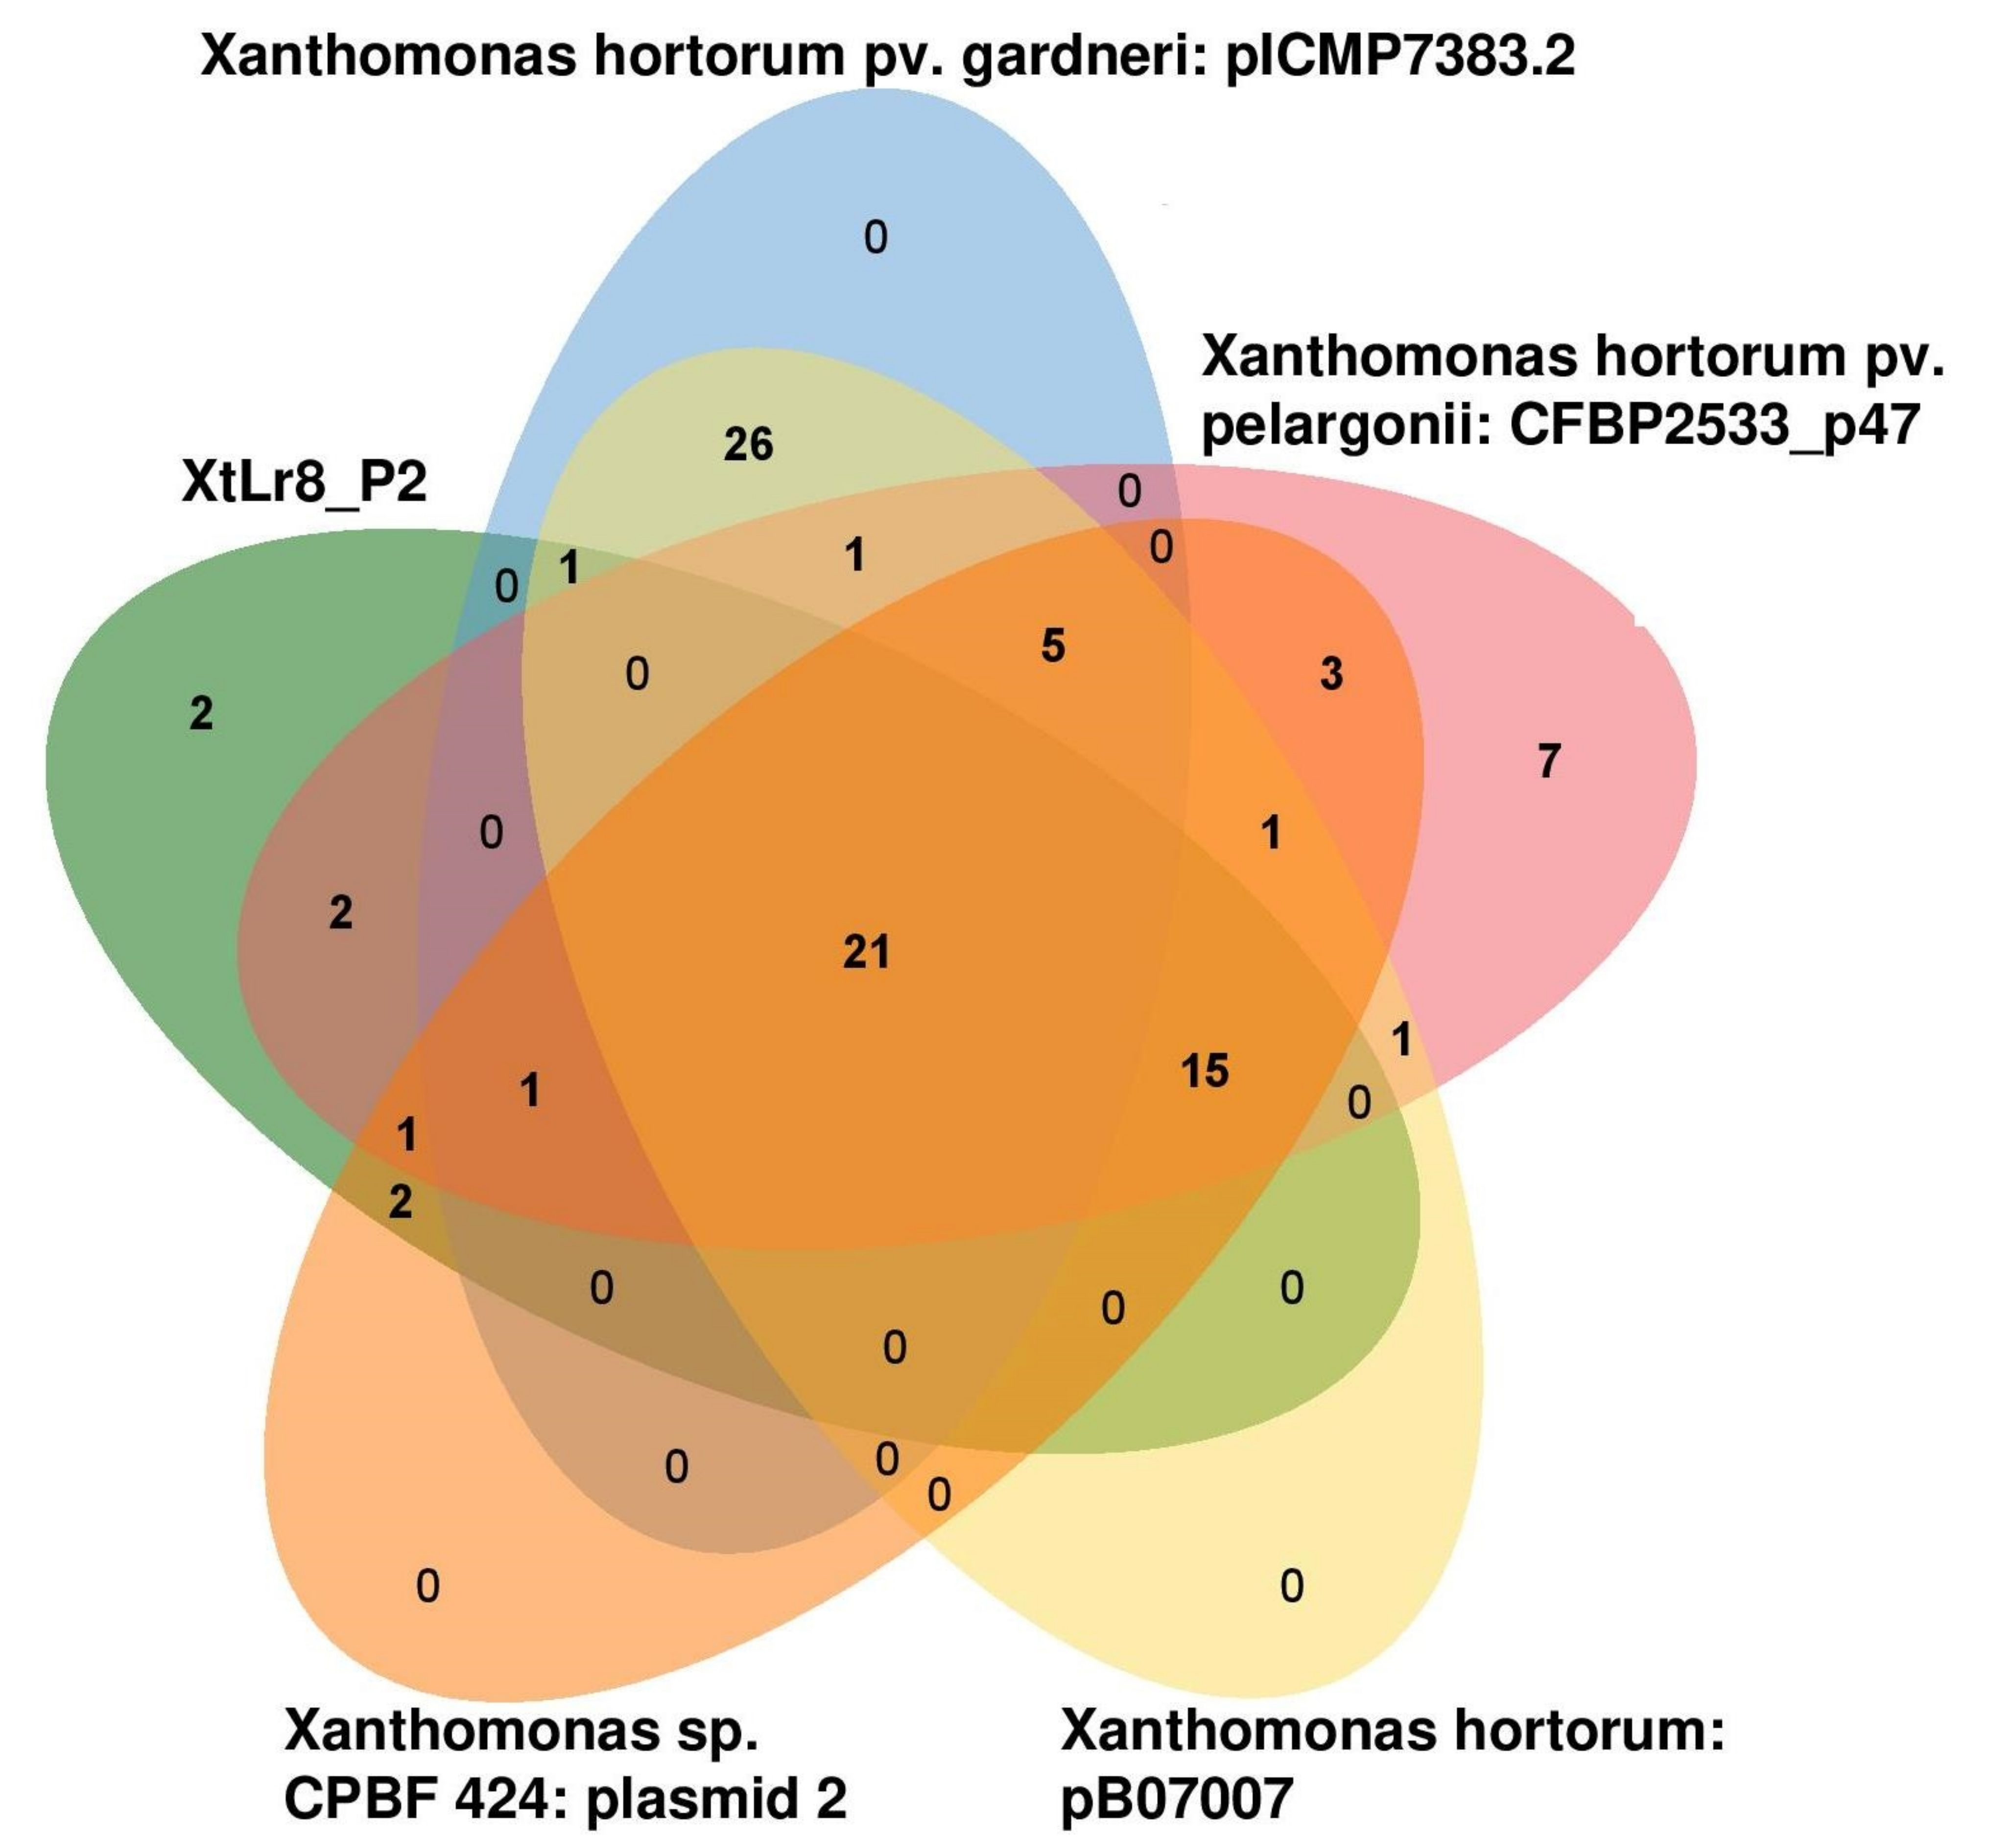

Supplement: Image_4.pdf [file Image_4.pdf]
